# Supplementary material
Source: Royal Society of Chemistry journal article supplement (doi:10.1039/d5fo04327a)
Supplement: d5fo04327a1.pdf [file d5fo04327a1.pdf]

**Online Supporting Material**

**Supplementary table 1.** Percentage contribution of main food groups to dietary calcium intake

| <b>Variable</b>                 | <b>Excluded participants</b> | <b>Included participants</b> |
|---------------------------------|------------------------------|------------------------------|
| Vegetables, %                   | 29.0                         | 30.5                         |
| Milk and dairy products, %      | 25.1                         | 24.8                         |
| Legumes and legumes products, % | 14.5                         | 15.4                         |
| Cereals, %                      | 7.8                          | 9.1                          |
| Eggs, %                         | 2.8                          | 3.1                          |
| Fruits, %                       | 2.6                          | 2.5                          |
| Fish, shrimp, and shellfish, %  | 1.3                          | 1.6                          |
| Meats, %                        | 1.0                          | 1.0                          |
| Snack and fast foods, %         | 0.6                          | 0.6                          |

**Supplementary table 2.** Sensitivity analyses for the association of dietary calcium and its food sources with age-related macular degeneration

| Variable                                                                                                              | Odds ratios (95% CIs) by tertiles of intake level |                   |                   | <i>P</i> <sub>-trend</sub> |
|-----------------------------------------------------------------------------------------------------------------------|---------------------------------------------------|-------------------|-------------------|----------------------------|
|                                                                                                                       | T1                                                | T2                | T3                |                            |
|                                                                                                                       | (Lowest)                                          |                   | (Highest)         |                            |
| <b>Calcium</b>                                                                                                        |                                                   |                   |                   |                            |
| Further adjusting for sunlight exposure, sun-protective gear use, and daily electronic and computerized equipment use | 1                                                 | 0.53 (0.26, 1.06) | 0.46 (0.23, 0.93) | 0.03                       |
| Further adjusting for protein, fat, vitamin E, copper, and zinc                                                       | 1                                                 | 0.48 (0.23, 1.00) | 0.43 (0.20, 0.94) | 0.04                       |
| Adjustment for major dietary factors instead of modified AHEI                                                         | 1                                                 | 0.40 (0.16, 0.98) | 0.37 (0.14, 0.97) | 0.04                       |
| Adjustment for continuously measured covariates on their original scale rather than in categorical form               | 1                                                 | 0.50 (0.26, 0.99) | 0.45 (0.23, 0.86) | 0.02                       |
| Excluding current and past smoker                                                                                     | 1                                                 | 0.75 (0.44, 1.26) | 0.48 (0.27, 0.83) | 0.01                       |
| Excluding individuals with dietary supplement use                                                                     | 1                                                 | 0.86 (0.53, 1.39) | 0.59 (0.35, 1.00) | 0.01                       |
| Excluding individuals with type 2 diabetes                                                                            | 1                                                 | 0.75 (0.47, 1.20) | 0.59 (0.36, 0.97) | 0.05                       |
| Excluding individuals with cardiovascular disease                                                                     | 1                                                 | 0.70 (0.44, 1.10) | 0.50 (0.30, 0.81) | 0.01                       |
| Unmatched case-control analysis                                                                                       | 1                                                 | 0.93 (0.65, 1.33) | 0.67 (0.45, 0.98) | 0.02                       |
| <b>Dairy calcium</b>                                                                                                  |                                                   |                   |                   |                            |
| Further adjusting for sunlight exposure, sun-protective gear use, and daily electronic and computerized equipment use | 1                                                 | 0.94 (0.50, 1.78) | 0.47 (0.24, 0.93) | 0.04                       |
| Further adjusting for protein, fat, vitamin E, copper, and zinc                                                       | 1                                                 | 0.74 (0.38, 1.47) | 0.46 (0.22, 0.98) | 0.04                       |
| Adjustment for major dietary factors instead of modified AHEI                                                         | 1                                                 | 0.90 (0.43, 1.87) | 0.44 (0.20, 0.93) | 0.03                       |

|                                                                                                         |   |                   |                   |       |
|---------------------------------------------------------------------------------------------------------|---|-------------------|-------------------|-------|
| Adjustment for continuously measured covariates on their original scale rather than in categorical form | 1 | 0.85 (0.46, 1.55) | 0.47 (0.24, 0.91) | 0.04  |
| Excluding current and past smoker                                                                       | 1 | 0.63 (0.38, 1.05) | 0.42 (0.25, 0.71) | <0.01 |
| Excluding individuals with dietary supplement use                                                       | 1 | 0.64 (0.39, 1.04) | 0.61 (0.37, 0.99) | 0.04  |
| Excluding individuals with type 2 diabetes                                                              | 1 | 0.81 (0.51, 1.29) | 0.55 (0.34, 0.88) | 0.01  |
| Excluding individuals with cardiovascular disease                                                       | 1 | 0.83 (0.53, 1.31) | 0.60 (0.37, 0.96) | 0.03  |
| Unmatched case-control analysis                                                                         | 1 | 0.67 (0.47, 0.96) | 0.53 (0.37, 0.76) | <0.01 |

<sup>a</sup>Odds ratios were adjusted for matching factors, educational level (less than college graduate or college or above), self-reported regular physical activity (yes or no), sunlight exposure (< 2 or ≥ 2 hours/day), body mass index (kg/m<sup>2</sup>: <24.0 or ≥ 24.0), dietary supplement use (yes or no), family history of age-related macular degeneration (yes or no), and modified Alternative Healthy Eating Index (continuous). AHEI, Alternative Healthy Eating Index; CI, confidence interval; T, tertiles.

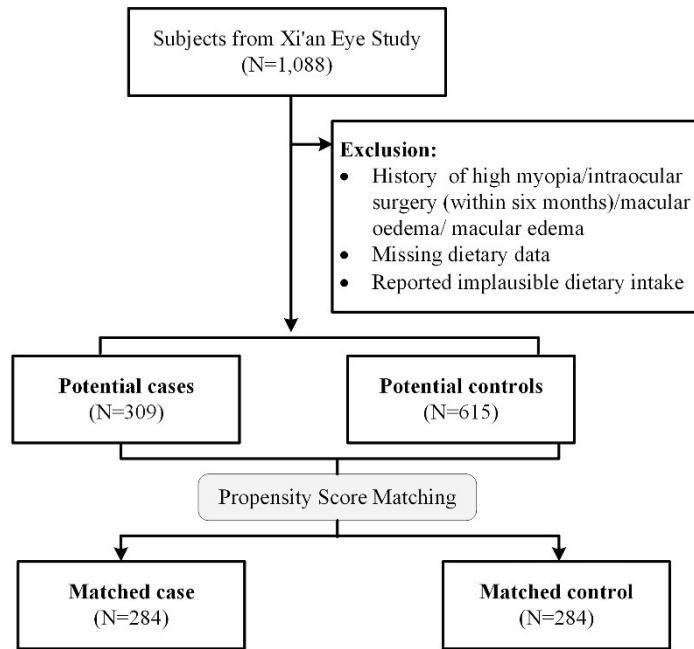

**Supplementary figure 1.** Flowchart of participant selection for the matched case-control study

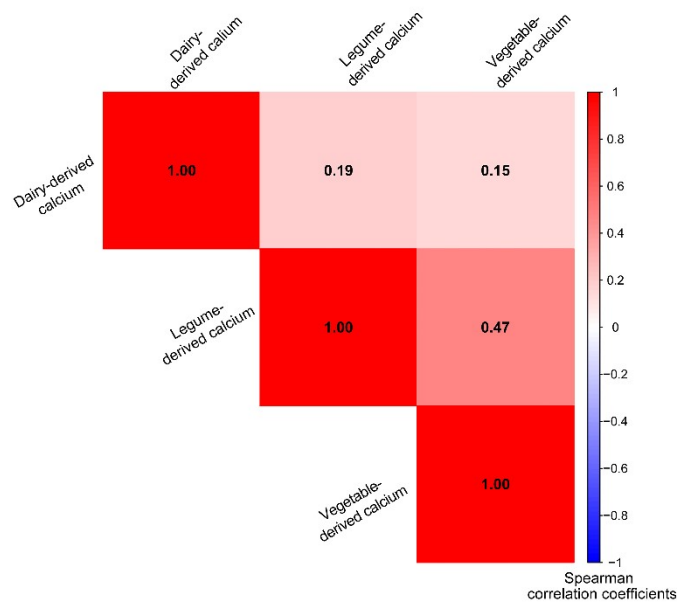

**Supplementary figure 2.** Spearman correlations between dietary calcium intakes from major food sources

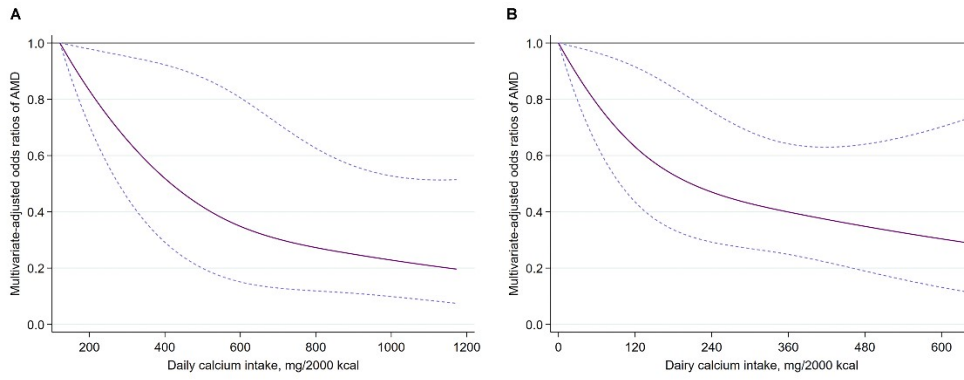

**Supplemental figure 3.** Restricted cubic spline analysis of the association of dietary calcium (A) and dairy calcium (B) intakes with age-related macular degeneration. Adjusted for matching factors, educational level (less than college graduate or college or above), self-reported regular physical activity (yes or no), sunlight exposure (< 2 or  $\geq$  2 hours/day), body mass index ( $\text{kg}/\text{m}^2$ : < 24.0 or  $\geq$  24.0), dietary supplement use (yes or no), family history of age-related macular degeneration (yes or no), and modified Alternative Healthy Eating Index (continuous). Solid lines represent odds ratios and dotted lines represent 95% confidence intervals.
