# Supplementary material
Source: Royal Society of Chemistry journal article supplement (doi:10.1039/d5fo04327a)
Supplement: d5fo04327a2.xlsx [file d5fo04327a2.xlsx]

## Sheet: Data
Match_ID	AMD_status	Gender	Age	Smoking	Education_Level	Physical_Activity	Supp_Use	Sunlight_Exposure_Time	Sunlight_Protection	Phonetime_cat2	Sunlight_Category	BMI_Category	BMI	Family_History_AMD	CVD_History	Diabetes_History	Total_Energy	Dietary_Protein	Dietary_Lipid	Dietary_Lutein	Dietary_Vit_C	Dietary_Vit_D	Dietary_Vit_E	Dietary_Copper	Dietary_Zinc	ModifiedAHEI	Propensity_Score	Calcium_EnergyAdj_Tertile	Calcium_EnergyAdj_Linear	DairyCa_EnergyAd_Tertile	DairyCa_EnergyAdj_linear	Veg_Ca_Tertile	VegCa_EnergyAdj_linear	Soy_Ca_Tertile	SoyCa_EnergyAdj_linear	Milk_cat3	Milk_linear	Yogurt_cat3	Yogurt_linear	Milkpowder_cat2	Milkpowder_linear
1	1	2	51	0	1	0	0	7	0	1	1	1	27.2911	0	0	0	3093.61	74.12	201	6186.34	102.62	53.575	110.24	2.31	13.15	44.5969	0.16847	1	419.669	1	26.9267	1	60.432	1	26.3893	1	0	1	0	1	0
1	0	2	55	0	2	1	0	1	1	2	0	0	18.7069	0	0	0	3921.06	94.66	273.39	10484.1	280.12	107.15	111.44	3.17	16.98	43.8326	0.169036	1	419.669	1	26.9267	2	122.727	1	26.3893	2	1.5	3	5.25	2	7.9996
2	1	2	45	0	2	0	0	0	0	1	0	0	23.5043	0	0	0	1477.44	62.78	65.82	6263.22	130.31	0	31.05	2.11	11.13	37.8227	0.178436	2	637.314	2	169.168	2	122.727	3	164.527	2	1.5	2	0.75	2	7.9996
2	0	2	52	0	1	1	0	0	0	1	0	0	20.1155	0	0	0	3009.77	124.89	136.38	8698.45	191.92	53.575	58.39	3.59	23.79	38.1694	0.176985	2	637.314	3	337.411	2	122.727	3	164.527	1	0	3	5.25	2	7.9996
3	0	2	57	0	2	1	0	1	1	2	0	0	19.7222	0	0	1	3848.39	177.19	151.92	13588.7	219.22	125	112.48	5.55	24.52	43.3934	0.183559	3	835.466	2	169.168	2	122.727	3	164.527	3	7	3	5.25	1	0
3	1	2	52	0	2	1	0	2	0	2	1	1	25.1963	0	0	0	2814.19	62.16	195.18	7857.32	239.07	35.725	101.72	2.18	12.32	43.6115	0.182801	1	419.669	1	26.9267	2	122.727	3	164.527	2	1.5	2	0.75	1	0
4	0	2	52	0	1	1	0	10	0	1	1	0	21.7347	0	0	0	2769.27	108.8	117.35	7990.56	155.63	8.925	49.96	3.99	17.74	36.2991	0.184157	1	419.669	1	26.9267	1	60.432	3	164.527	2	1.5	2	0.75	2	7.9996
4	1	2	50	0	2	1	1	1	1	2	0	1	28.6368	1	0	0	2352.36	115.98	123.05	11837.1	167.56	125	54.43	4.59	15.61	36.6906	0.183951	2	637.314	1	26.9267	3	237.914	3	164.527	1	0	3	5.25	1	0
5	0	2	56	1	1	0	0	0	0	2	0	0	23.1291	0	0	1	3528.56	147.2	117.04	22466.1	223.08	125	61.83	4.36	23.44	56.4007	0.186843	3	835.466	2	169.168	3	237.914	2	82.5194	3	7	3	5.25	1	0
5	1	2	51	0	2	1	1	3.5	1	2	1	0	23.6686	0	0	0	2474.89	61.33	131.43	3629.11	99.16	89.275	69.47	1.7	11.23	36.4272	0.186669	1	419.669	2	169.168	1	60.432	2	82.5194	1	0	3	5.25	1	0
6	1	2	51	0	2	0	0	2	0	2	1	0	21.2306	1	0	0	2442.99	67.64	175.61	3067.65	55.48	17.85	83.73	2.11	12.29	33.7849	0.187647	1	419.669	1	26.9267	1	60.432	1	26.3893	2	1.5	2	0.75	1	0
6	0	2	57	0	1	1	0	4	0	2	1	1	24.2815	1	0	0	3665.64	134.62	161.26	4951.78	125.05	125	65.56	4.73	21.04	25.4927	0.189144	2	637.314	2	169.168	1	60.432	3	82.5194	2	1.5	2	0.75	2	7.9996
7	0	2	59	0	2	1	0	4	1	2	1	0	17.2548	0	0	0	3965.39	228.38	107.91	30177.3	383.17	125	72.24	7.51	33.4	46.6254	0.193006	3	835.466	2	169.168	3	237.914	3	82.5194	1	0	2	0.75	2	7.9996
7	1	2	55	0	2	1	1	3	1	2	1	1	25.2363	0	0	0	3257.17	154.85	116.88	19506.6	216.22	125	78.53	4.92	21.69	56.2851	0.188672	2	637.314	1	26.9267	2	122.727	3	164.527	1	0	1	0	1	0
8	0	2	56	0	2	1	0	2	0	2	1	0	21.5668	1	0	0	3278.24	139.48	136.06	11226.7	109.74	89.275	64.46	4.19	20.45	51.023	0.19463	1	419.669	1	26.9267	1	60.432	3	164.527	2	1.5	2	0.75	1	0
8	1	2	47	0	2	1	0	0	0	1	0	0	23.4375	0	0	0	1440.17	54.16	82.84	89.65	9.17	53.575	27.48	1.41	7.96	19.2504	0.192467	1	419.669	2	169.168	1	60.432	1	26.3893	2	1.5	2	0.75	1	0
9	0	2	56	0	1	0	0	0	1	2	0	0	22.4793	0	0	0	3253.07	181.34	145.3	22248.6	294.76	125	111.93	5.03	23.24	33.1549	0.195426	3	835.466	2	169.168	3	237.914	2	82.5194	2	1.5	2	0.75	1	0
9	1	1	47	0	2	1	0	0	0	1	0	1	25.2363	0	0	0	3222.21	147.69	148.99	5721.42	130.07	125	49.67	4.11	25.11	41.8498	0.194166	2	637.314	3	337.411	1	60.432	1	26.3893	2	1.5	3	5.25	2	7.9996
10	0	2	59	0	2	1	0	1	1	2	0	0	22.2599	0	0	0	3708.95	140.98	193.57	8728.04	184.75	125	40.56	3.21	22.75	58.555	0.201185	1	419.669	2	169.168	1	60.432	3	164.527	3	7	2	0.75	1	0
10	1	2	60	0	1	0	0	0	0	2	0	1	26.2574	0	0	0	3991.87	250.64	178.68	20329.8	233.53	267.85	87.09	7.22	35.3	40.4193	0.198894	2	637.314	1	26.9267	2	122.727	3	164.527	2	1.5	1	0	2	7.9996
11	1	2	45	0	1	0	0	0	1	1	0	0	23.067	0	0	0	805.13	42.65	43.09	11408.2	186.21	107.15	23.16	1.25	7.1	43.5351	0.199174	3	835.466	1	26.9267	3	237.914	3	164.527	1	0	1	0	1	0
11	0	2	56	0	1	1	1	1	0	2	0	0	20.9953	0	0	0	3071.74	116.48	107.53	25875.1	247.38	53.575	60.69	4.35	19.78	40.4157	0.201237	3	835.466	2	169.168	2	122.727	3	164.527	3	7	1	0	1	0
12	0	2	59	0	1	0	0	0	0	2	0	1	25.8948	0	0	0	3695.4	182.22	154.85	23967.4	237.8	250	92.8	6.5	24.82	59.3062	0.201625	3	835.466	2	169.168	3	237.914	3	164.527	2	1.5	3	5.25	1	0
12	1	2	49	0	2	1	1	0	0	1	0	0	19.6511	0	0	0	1571.76	42.05	95.14	1573.2	51.92	0	30.69	0.91	6.36	21.0345	0.201786	1	419.669	3	337.411	1	60.432	3	164.527	3	7	1	0	1	0
13	1	2	50	0	2	0	0	0.5	0	2	0	0	19.9284	0	0	0	1647.88	56.98	55.05	1776.92	44.42	89.275	28	1.7	9.64	34.502	0.206229	1	419.669	2	169.168	1	60.432	2	82.5194	2	1.5	2	0.75	2	7.9996
13	0	2	56	0	2	1	1	5	1	2	1	0	22.2816	0	1	1	2921.95	125.38	118.03	41669.5	399.62	125	75.24	3.86	21.36	57.696	0.206134	3	835.466	2	169.168	3	237.914	3	164.527	3	7	2	0.75	1	0
14	0	2	57	0	2	1	0	1	1	2	0	1	24.6137	0	0	0	3110.16	108.46	116.68	45214.7	274.56	125	63	3.75	18.29	62.2829	0.206916	2	637.314	1	26.9267	3	237.914	1	26.3893	1	0	2	0.75	1	0
14	1	2	60	0	1	1	1	5	0	1	1	0	21.4453	0	0	0	3749.12	204.05	119.82	26991	324.84	125	72.38	6.12	31.97	49.1506	0.206805	2	637.314	2	169.168	3	237.914	3	164.527	2	1.5	2	0.75	2	7.9996
15	1	2	59	0	1	1	0	2	1	2	1	1	27.9297	0	0	0	3436.55	87.65	183.36	8303.04	164.77	125	107.49	3.89	16.79	49.4926	0.210154	1	419.669	1	26.9267	1	60.432	2	82.5194	1	0	1	0	1	0
15	0	2	61	0	1	1	0	0	0	2	0	0	23.3731	1	0	0	3859.67	116.04	186.31	6861.31	178.04	125	63.28	3.79	27.18	26.8199	0.210175	1	419.669	3	337.411	1	60.432	1	26.3893	3	7	2	0.75	2	7.9996
16	1	2	50	0	1	1	0	0	0	2	0	1	24.2578	1	0	0	1427.23	40.75	64.61	0	141.61	0	27.94	1.17	4.89	26.9834	0.213605	1	419.669	1	26.9267	1	60.432	1	26.3893	1	0	2	0.75	1	0
16	0	2	61	0	1	1	0	0	0	2	0	1	26.6683	0	0	0	3751.79	153.14	112.36	16579.3	297.5	125	61.31	5.59	25.34	47.2068	0.213807	1	419.669	1	26.9267	3	237.914	2	82.5194	1	0	1	0	1	0
17	1	2	50	0	2	1	0	0	0	2	0	0	23.6275	1	0	0	1363.86	54.08	70.11	4421.54	85.55	125	35.83	1.54	8.42	29.8361	0.215758	1	419.669	1	26.9267	2	122.727	3	164.527	2	1.5	2	0.75	1	0
17	0	2	60	0	2	1	1	3	1	1	1	1	24.4913	1	0	0	3478.68	127.9	129.16	8675.12	107.45	125	55.88	4.44	19.49	37.8972	0.21589	2	637.314	2	169.168	1	60.432	2	82.5194	3	7	3	5.25	1	0
18	0	2	55	0	2	1	0	1	0	2	0	0	20.6175	0	0	0	2405.37	71.09	97.82	13209.4	204.55	53.575	55.91	2.47	13.07	40.4172	0.216367	1	419.669	1	26.9267	2	122.727	1	26.3893	1	0	2	0.75	1	0
18	1	2	60	0	1	0	1	2	1	1	1	1	26.9531	1	0	0	3464.7	161.52	185.29	18463.3	179.16	53.575	89.33	5.06	23.66	53.4768	0.216367	1	419.669	1	26.9267	1	60.432	3	164.527	1	0	2	0.75	1	0
19	0	2	60	0	2	0	0	1	0	2	0	0	22.1094	0	0	0	3462.07	106.42	197.32	14270.1	196.84	125	94.63	3.81	17.57	49.191	0.216457	1	419.669	2	169.168	2	122.727	2	82.5194	3	7	2	0.75	1	0
19	1	2	56	0	2	0	1	3	0	2	1	1	24.1797	1	0	0	2601.39	97	146.89	6547.51	106.85	125	66.92	2.69	13.63	32.1901	0.216909	3	835.466	3	337.411	1	60.432	1	26.3893	3	7	3	5.25	1	0
20	0	2	58	0	2	1	0	0.5	0	2	0	0	23.6678	0	0	0	2989.28	111.75	154.57	12668.1	202.48	125	45.48	3.42	16.95	48.5467	0.218139	2	637.314	1	26.9267	2	122.727	2	82.5194	2	1.5	2	0.75	1	0
20	1	2	51	0	1	1	0	0	0	2	0	0	19.9219	0	0	0	1508.55	86.2	59.57	13247	110.28	0	39.15	1.82	14.67	38.9811	0.218058	3	835.466	2	169.168	3	237.914	2	82.5194	1	0	3	5.25	1	0
21	1	2	54	0	1	0	0	0.5	0	2	0	1	31.0651	0	0	0	2128.95	55.42	93.01	6774.76	99.63	0	52.34	1.55	10.16	38.8646	0.218581	1	419.669	1	26.9267	2	122.727	2	82.5194	1	0	1	0	1	0
21	0	2	59	0	2	0	0	1	0	2	0	0	22.3569	0	0	0	3176.17	95.58	131.41	1958.48	42.87	125	39.87	2.46	14.8	34.9269	0.218998	1	419.669	2	169.168	1	60.432	1	26.3893	3	7	1	0	1	0
22	1	2	51	0	2	1	0	0	0	2	0	1	30.7345	0	0	0	1427.97	46.52	68.1	1550.17	37.31	125	40.35	1.29	6.79	25.3855	0.22084	1	419.669	1	26.9267	1	60.432	1	26.3893	1	0	2	0.75	1	0
22	0	2	57	0	2	1	1	0	0	1	0	0	18.0078	0	0	0	2691.96	126.23	121.38	12959.2	216.94	125	70.1	4.15	18.13	53.7351	0.22109	3	835.466	3	337.411	3	237.914	3	82.5194	3	7	2	0.75	1	0
23	1	2	56	2	1	1	0	4	0	2	1	1	24.5172	1	0	0	2455.36	111.27	105.09	1798.91	56.73	71.425	1014.75	4355.58	15.45	41.3428	0.22195	3	835.466	2	169.168	2	122.727	3	164.527	2	1.5	3	5.25	1	0
23	0	2	58	0	2	0	1	0	0	1	0	0	20.412	0	0	0	2877.95	128.13	124.34	19940.9	302.04	71.425	69.11	3.92	25.3	50.9875	0.22199	3	835.466	3	337.411	3	237.914	3	164.527	2	1.5	3	5.25	2	7.9996
24	0	2	61	0	2	1	0	0	0	2	0	1	24.5554	0	0	0	3486.23	222	113.16	49416.8	516.23	125	94.28	7.98	30.94	55.0033	0.222943	3	835.466	2	169.168	3	237.914	3	164.527	3	7	3	5.25	1	0
24	1	2	58	0	1	0	1	0	1	2	0	0	23.1533	0	0	0	2848.73	93.9	141.3	5063.03	93.39	62.5	38.26	3.76	16.09	25.6068	0.223009	1	419.669	2	169.168	1	60.432	1	26.3893	1	0	1	0	2	7.9996
25	0	2	62	0	1	1	0	1	0	2	0	0	22.8624	0	0	0	3669.38	151.87	144.23	10498.9	212.1	53.575	61.73	4.94	25.22	42.7506	0.223947	2	637.314	3	337.411	2	122.727	2	82.5194	3	7	2	0.75	2	7.9996
25	1	2	52	0	2	0	0	1	0	2	0	1	24.7475	0	0	0	1549.97	50.96	116.3	8658.74	83.89	17.85	53.62	1.7	7.68	30.665	0.223973	1	419.669	1	26.9267	2	122.727	2	82.5194	2	1.5	1	0	1	0
26	0	2	61	1	1	1	0	0	0	2	0	1	26.8566	0	0	0	3382.44	125.38	126.69	56019.7	197.05	125	60.14	3.94	18.76	36.3283	0.226588	2	637.314	2	169.168	3	237.914	2	82.5194	1	0	3	5.25	1	0
26	1	2	59	0	2	1	0	0	0	1	0	1	29.1797	1	0	0	2934.71	40.18	222.96	5755.56	66.93	125	130.6	1.48	10.1	37.4542	0.227437	1	419.669	1	26.9267	1	60.432	1	26.3893	1	0	2	0.75	1	0
27	0	2	61	0	1	1	1	1	0	2	0	0	22.9761	0	0	0	3330.63	61.89	240.05	9574.3	121.47	89.275	140.62	2.06	12.37	43.0661	0.228423	1	419.669	2	169.168	1	60.432	1	26.3893	3	7	3	5.25	1	0
27	1	2	57	0	1	1	1	0	1	2	0	0	23.0824	0	0	0	2488.28	148.13	90.32	27480.2	315.32	0	113.3	5.21	21.05	48.7946	0.228241	3	835.466	1	26.9267	3	237.914	3	164.527	1	0	1	0	1	0
28	0	2	59	0	1	1	0	0	0	1	0	0	23.1038	0	0	0	2867.93	100.76	120.83	14342.8	154.22	125	80.63	3.36	15.12	28.9731	0.22981	1	419.669	1	26.9267	2	122.727	2	82.5194	1	0	3	5.25	1	0
28	1	2	57	0	2	0	0	5	1	2	1	1	24.9962	1	0	0	2425.09	104.39	93.47	49775	269.78	0	42.78	2.94	18.06	40.9423	0.230493	3	835.466	2	169.168	3	237.914	3	164.527	3	7	1	0	1	0
29	1	2	54	0	2	0	0	0	0	2	0	1	27.375	0	0	0	1666.49	104.83	60.69	7580.28	240.84	1.775	35.9	3.68	14.52	46.1666	0.234919	2	637.314	1	26.9267	2	122.727	3	164.527	2	1.5	2	0.75	2	7.9996
29	0	2	64	0	2	0	1	0	0	1	0	0	23.6004	0	1	0	3787.96	128.51	168.97	7040.39	279.48	125	130.78	4.73	19.62	38.4743	0.234818	2	637.314	2	169.168	2	122.727	3	164.527	3	7	2	0.75	1	0
30	1	2	62	0	2	1	0	1	0	2	0	1	24.9851	0	0	0	3356.84	152.29	117	20306.8	132.49	125	65.1	4.69	22.39	58.1173	0.235086	2	637.314	3	337.411	2	122.727	3	164.527	3	7	3	5.25	1	0
30	0	2	60	0	2	1	0	4	1	2	1	0	18.776	1	0	0	2874.29	123.53	143.02	17423.4	173.92	125	45.7	3.97	17.9	54.0882	0.237224	3	835.466	3	337.411	2	122.727	3	164.527	2	1.5	3	5.25	1	0
31	0	2	58	0	2	1	0	0	0	2	0	0	22.2147	1	0	0	2448.7	123.28	72.69	8243.07	282.95	125	33.16	2.48	32.78	22.9671	0.237292	3	835.466	3	337.411	1	60.432	2	82.5194	3	7	3	5.25	2	7.9996
31	1	2	57	0	1	1	0	0	0	1	0	0	21.4651	0	0	0	2257.75	98.4	81.69	13793.2	103.73	250	37.66	2.46	14.51	40.9147	0.236529	1	419.669	1	26.9267	2	122.727	2	82.5194	1	0	1	0	1	0
32	0	2	61	0	1	1	0	0	0	2	0	1	24.1503	0	0	0	3067.13	129.94	149.99	6832.15	128.67	125	62.27	4.58	17.89	35.5107	0.237919	3	835.466	1	26.9267	1	60.432	2	82.5194	2	1.5	2	0.75	1	0
32	1	2	55	0	1	1	0	4	1	2	1	1	28.179	0	0	0	1832.99	74.43	76.49	11019.3	80.33	125	29.3	1.98	13.62	41.1456	0.236567	1	419.669	2	169.168	2	122.727	2	82.5194	2	1.5	1	0	1	0
33	1	2	55	0	2	0	0	2	1	2	1	1	24.9561	0	0	0	1802.84	71.69	73.63	28370	245.87	125	49.35	2.28	11.76	46.0821	0.237666	3	835.466	1	26.9267	3	237.914	2	82.5194	1	0	3	5.25	1	0
33	0	2	57	0	2	0	0	0	0	2	0	1	28.0992	0	0	0	2200.17	99.43	86.95	7388.08	205.38	35.725	59.99	3.42	14.54	32.3045	0.238632	3	835.466	3	337.411	2	122.727	3	164.527	3	7	3	5.25	1	0
34	1	2	54	0	1	0	0	0	0	1	0	1	25.2248	0	0	0	1578.59	46.41	53.56	7333.93	97.92	250	28.29	1.51	9.79	40.7422	0.238119	1	419.669	1	26.9267	2	122.727	1	26.3893	1	0	1	0	1	0
34	0	2	58	0	2	1	0	0	1	2	0	1	26.7969	0	0	0	2405.18	115.55	112.74	13757	147.19	125	61.7	3.44	17.28	32.3319	0.238883	3	835.466	1	26.9267	3	237.914	3	164.527	1	0	1	0	2	7.9996
35	1	2	55	0	1	0	1	10	0	2	1	0	21.2279	0	0	0	1736.37	35.62	96.69	2899.65	40.77	17.85	51.65	1	7.13	40.2485	0.240102	1	419.669	1	26.9267	1	60.432	1	26.3893	1	0	1	0	1	0
35	0	2	60	0	2	1	1	0	0	2	0	0	22.7235	0	0	0	2790.61	104.28	117.33	21283.7	172.27	89.275	41.1	3.26	15.49	34.8364	0.24029	2	637.314	2	169.168	2	122.727	2	82.5194	3	7	3	5.25	1	0
36	0	2	59	0	2	1	0	1.5	0	2	0	0	23.8343	0	1	0	2447.57	102.3	73.44	11570.7	242.6	125	43.53	3.19	17.9	34.316	0.245149	2	637.314	2	169.168	3	237.914	2	82.5194	3	7	2	0.75	1	0
36	1	2	55	0	2	1	0	1	0	2	0	1	26.1524	0	0	0	1600.87	49.3	90.74	3333.47	62.13	89.275	29.92	1.12	8.82	32.9983	0.245121	3	835.466	3	337.411	1	60.432	2	82.5194	3	7	3	5.25	1	0
37	0	2	56	0	2	1	0	2	1	2	1	0	23.7109	0	0	0	1746.59	48.98	78.92	11783.6	81.41	35.725	42.62	1.99	9.83	48.3956	0.247596	1	419.669	1	26.9267	2	122.727	1	26.3893	1	0	2	0.75	1	0
37	1	2	55	0	1	1	0	1	1	2	0	0	20.6698	0	0	0	1543.56	63.68	54.82	7936.12	137.03	125	28.08	2.16	9.96	28.1046	0.247264	3	835.466	3	337.411	2	122.727	2	82.5194	3	7	2	0.75	1	0
38	0	2	60	0	2	1	0	2	0	2	1	1	24.5603	0	0	0	2560.94	56.57	181.29	3646.18	62.43	53.575	88.25	1.84	11.06	41.9158	0.248842	1	419.669	2	169.168	1	60.432	2	82.5194	3	7	3	5.25	1	0
38	1	2	64	0	1	1	0	1	0	1	0	0	22.4323	1	0	1	3408.24	153.41	198.34	23819.6	139.22	0	93.08	4.76	27.59	36.0729	0.248848	1	419.669	1	26.9267	2	122.727	3	164.527	1	0	1	0	1	0
39	0	2	62	0	2	1	0	2	0	2	1	1	24.3818	0	0	0	2944.91	140.33	147.28	25454.1	184.34	125	52.43	3.33	18.13	44.1777	0.250343	2	637.314	1	26.9267	3	237.914	2	82.5194	1	0	2	0.75	1	0
39	1	2	55	0	2	0	0	0	0	2	0	0	21.875	1	0	0	1460.87	57.32	74.55	288.08	88.91	0	317.74	1517.09	5.32	41.5116	0.25038	1	419.669	1	26.9267	1	60.432	1	26.3893	1	0	1	0	1	0
40	0	2	61	0	2	1	0	2	1	2	1	1	27.4609	0	0	0	2677.64	80.07	142.77	11889.8	213.27	125	74.46	2.42	13.59	47.7665	0.252445	2	637.314	2	169.168	2	122.727	2	82.5194	3	7	3	5.25	1	0
40	1	2	56	0	1	0	0	0	1	1	0	0	22.3047	0	0	0	1620.07	69.56	74.67	9707.05	139.97	125	51.49	1.86	10.93	39.6953	0.252377	3	835.466	3	337.411	3	237.914	2	82.5194	2	1.5	3	5.25	1	0
41	0	2	58	0	1	1	0	0	1	2	0	0	19.7574	1	0	1	2030.14	93.99	56.08	15867	196.65	125	50.28	3.53	14.9	42.5789	0.252897	3	835.466	2	169.168	3	237.914	3	164.527	2	1.5	3	5.25	1	0
41	1	2	53	0	2	1	0	0	1	2	0	0	22.3805	0	0	0	974.7	30.48	51.27	1134.87	48.35	62.5	30.31	1.06	6.17	34.1651	0.252749	1	419.669	2	169.168	2	122.727	1	26.3893	2	1.5	2	0.75	1	0
42	1	2	50	1	2	1	1	0	1	2	0	0	18.8288	0	0	0	1478.86	105.8	60.74	7884.04	71.46	125	36.04	2.15	21.69	32.8711	0.253729	3	835.466	3	337.411	2	122.727	1	26.3893	3	7	2	0.75	1	0
42	0	2	62	0	1	1	1	0	0	1	0	0	23.0841	1	1	0	2856.2	104.86	163.8	7346.63	99.65	125	51.84	2.61	16.97	44.1142	0.253714	1	419.669	2	169.168	2	122.727	2	82.5194	3	7	1	0	1	0
43	1	2	60	0	1	1	0	8	1	2	1	0	22.0603	0	0	1	2428.82	99.24	101.17	15672.9	119.43	13.4	46.35	2.73	14.63	35.1989	0.253853	2	637.314	2	169.168	2	122.727	3	164.527	1	0	3	5.25	1	0
43	0	2	61	0	2	1	1	0.5	0	2	0	0	21.3382	0	0	0	2625.06	82.7	140.25	3895.75	92.8	125	46.77	1.87	13.05	38.826	0.25445	2	637.314	3	337.411	1	60.432	1	26.3893	3	7	3	5.25	1	0
44	1	2	57	0	1	1	0	3	1	2	1	0	20.4297	1	0	0	1734.81	53.55	87.43	4582.1	52.49	89.275	39.94	1.43	8.58	41.3402	0.256089	2	637.314	3	337.411	1	60.432	1	26.3893	3	7	2	0.75	1	0
44	0	2	63	0	2	0	0	0	0	1	0	0	22.2589	0	0	0	3005.57	130.18	105.27	20922.7	297.97	125	49.4	4.04	21.09	62.6841	0.256106	3	835.466	3	337.411	3	237.914	3	82.5194	3	7	3	5.25	1	0
45	1	2	70	0	2	1	0	2	1	2	1	0	20.5499	0	0	0	4404.1	250.29	254.45	10176.4	152.83	125	63.32	6.57	41.41	44.9209	0.259366	1	419.669	2	169.168	1	60.432	2	82.5194	2	1.5	3	5.25	1	0
45	0	1	52	0	2	1	1	2	0	2	1	1	24.8438	0	0	0	2426.23	107.05	83.9	1610.52	30.83	125	55.31	3.4	15.14	34.6747	0.259379	2	637.314	3	337.411	1	60.432	2	82.5194	3	7	2	0.75	2	7.9996
46	0	1	49	0	2	1	0	0	0	1	0	1	25.2082	0	0	0	1767.39	53.57	76.56	7215.83	91.38	125	31.99	1.21	8.84	23.4143	0.260279	2	637.314	3	337.411	2	122.727	1	26.3893	3	7	3	5.25	1	0
46	1	2	62	0	1	0	0	1.5	0	1	0	0	20.4444	0	0	0	2689.65	107.49	118.16	10144.3	175.97	107.15	58.85	4.14	17.45	46.5305	0.260122	2	637.314	2	169.168	2	122.727	3	164.527	1	0	3	5.25	1	0
47	0	2	63	0	2	1	0	0	0	2	0	0	19.6093	1	1	0	2868.06	107.7	146.51	9763.78	128.13	125	60.97	3.62	15.25	30.2256	0.261422	2	637.314	2	169.168	2	122.727	2	82.5194	2	1.5	3	5.25	2	7.9996
47	1	2	66	0	1	1	1	3	0	2	1	0	23.8797	1	1	1	3502.05	125.11	137.96	18005.1	281.75	142.85	62.56	5.75	22.83	49.9901	0.261485	2	637.314	2	169.168	3	237.914	2	82.5194	3	7	1	0	2	7.9996
48	1	1	49	0	2	1	1	0	0	2	0	0	20.6413	0	0	0	1728.5	46.18	84.55	6155.1	78.02	53.575	52.78	1.36	7.39	36.9284	0.261791	1	419.669	1	26.9267	1	60.432	1	26.3893	2	1.5	2	0.75	1	0
48	0	2	59	0	2	1	1	0	0	2	0	0	22.6457	1	0	0	2011.18	74.67	77.41	1871.28	47.49	125	20.52	2.1	11.18	31.3955	0.261789	3	835.466	3	337.411	1	60.432	1	26.3893	3	7	1	0	1	0
49	0	1	54	0	2	1	0	1	0	2	0	1	25.8196	0	0	0	2773.38	107.75	101.58	12393.4	242.49	89.275	58.15	3.24	19.02	54.8602	0.262355	3	835.466	3	337.411	3	237.914	3	164.527	3	7	2	0.75	2	7.9996
49	1	2	59	1	1	0	0	2	0	1	1	1	28.2942	0	0	0	1998.74	54.31	100.43	7987.45	99.68	125	51.03	1.38	9.55	39.4059	0.262274	2	637.314	3	337.411	2	122.727	1	26.3893	3	7	1	0	1	0
50	1	2	67	0	1	0	1	2	0	2	1	1	24.3681	0	0	0	3662.04	141.85	180.73	4126.89	104.74	125	76.26	4.5	19.88	49.9564	0.263509	1	419.669	2	169.168	1	60.432	2	82.5194	2	1.5	3	5.25	1	0
50	0	2	62	0	1	1	1	1	1	2	0	1	25.8984	0	0	0	2599.78	92.79	157.96	3222.38	66.88	125	74.3	2.63	13.5	34.508	0.263624	1	419.669	2	169.168	1	60.432	2	82.5194	2	1.5	2	0.75	2	7.9996
51	0	2	63	0	1	1	0	5	1	2	1	0	21.862	1	0	0	2811.52	120.05	114.53	24314.5	159.18	125	48.44	3.13	19.09	44.1974	0.263629	2	637.314	3	337.411	2	122.727	1	26.3893	3	7	3	5.25	1	0
51	1	2	64	0	2	1	1	2	0	2	1	0	21.8254	0	0	0	3023.76	111.15	111.67	20496.2	415.89	89.275	48.19	4.63	17.66	49.8813	0.263614	3	835.466	2	169.168	3	237.914	3	164.527	2	1.5	3	5.25	1	0
52	1	2	61	0	2	1	0	0	0	1	0	1	28.125	0	0	1	2387.07	100.96	103.45	31245.7	249.86	8.925	82.35	2.48	16.26	34.1545	0.263657	2	637.314	1	26.9267	3	237.914	2	82.5194	2	1.5	2	0.75	1	0
52	0	2	62	0	2	1	1	1	0	2	0	1	25.2691	0	0	0	2590.31	111.29	125.85	18799.6	142.29	125	51.93	3.36	16.21	38.2194	0.263995	3	835.466	3	337.411	2	122.727	2	82.5194	3	7	3	5.25	1	0
53	0	2	60	0	1	0	0	0.5	0	2	0	1	24.2341	1	0	0	2092.69	81.64	102.56	10549.4	127.16	71.425	72.75	2.62	12.33	42.0077	0.266898	2	637.314	2	169.168	2	122.727	3	164.527	2	1.5	2	0.75	1	0
53	1	2	61	0	1	1	0	0	1	2	0	1	26.6728	1	0	0	2298.34	75.11	126.09	4205.65	95.27	125	50.26	2.51	11.3	42.6855	0.267144	1	419.669	2	169.168	1	60.432	2	82.5194	2	1.5	2	0.75	1	0
54	1	2	60	0	2	1	1	0	0	2	0	1	25.0292	0	0	0	2015.34	64.63	80.5	5687.59	86.79	125	33.78	1.6	12.2	30.9868	0.26996	2	637.314	3	337.411	1	60.432	1	26.3893	3	7	1	0	2	7.9996
54	0	2	60	0	2	1	1	0	0	2	0	0	22.719	0	0	0	2000.04	105.9	64.04	14023.1	182.36	53.575	37.96	3.24	15.53	37.147	0.270568	3	835.466	2	169.168	3	237.914	3	164.527	2	1.5	3	5.25	1	0
55	1	1	51	0	1	1	0	0	0	2	0	0	23.0518	0	0	0	1938.26	72.06	61.59	5889.93	139.73	250	31.88	1.94	10.59	41.7352	0.270212	1	419.669	1	26.9267	3	237.914	2	82.5194	2	1.5	1	0	1	0
55	0	2	60	0	2	1	0	1	0	2	0	1	26.5182	0	0	0	1991.11	82.36	120.94	7731.09	76.5	71.425	68.2	2.36	12.87	43.0609	0.270924	3	835.466	3	337.411	1	60.432	2	82.5194	3	7	2	0.75	1	0
56	1	1	67	0	2	0	0	0	0	1	0	0	22.8374	0	0	0	5246.57	233.16	188.59	25490.9	332.48	125	72.12	6.16	36.49	37.0229	0.273466	1	419.669	2	169.168	2	122.727	2	82.5194	2	1.5	2	0.75	2	7.9996
56	0	2	62	0	2	1	0	4	1	2	1	1	25.7819	0	0	0	2339.25	90.37	73.47	22192.9	173.69	44.65	33.42	2.62	14.2	42.8701	0.273944	2	637.314	2	169.168	3	237.914	1	26.3893	2	1.5	3	5.25	1	0
57	0	2	59	0	1	1	0	1	0	2	0	0	21.1932	0	0	0	1694.71	42.08	118.83	4766.63	95.53	53.575	61.84	1.31	7.95	33.8163	0.274302	1	419.669	1	26.9267	3	237.914	2	82.5194	2	1.5	2	0.75	1	0
57	1	2	62	0	2	1	1	0	0	2	0	1	27.7736	0	0	0	2330.87	106.01	115.86	17622.7	180.05	125	79.92	4.16	16.43	55.0793	0.27428	3	835.466	2	169.168	3	237.914	2	82.5194	1	0	3	5.25	1	0
58	1	2	61	0	1	0	0	0	0	1	0	1	25.9375	0	0	0	2116.06	86.02	95.6	7863.47	101.3	71.425	46.65	2.14	14.21	31.4457	0.274398	2	637.314	3	337.411	2	122.727	3	164.527	3	7	3	5.25	1	0
58	0	2	58	0	2	1	0	1	1	2	0	0	20.3894	0	0	0	1477.58	50.66	68.8	1367.88	50.46	142.85	33.46	1.5	9.6	26.4219	0.274514	2	637.314	3	337.411	1	60.432	2	82.5194	2	1.5	2	0.75	2	7.9996
59	0	1	59	0	2	1	1	2	0	2	1	0	21.1104	0	0	0	3486.14	137.73	126.53	24334.5	242.36	53.575	56.2	5.02	22.96	33.6182	0.276097	1	419.669	2	169.168	2	122.727	3	164.527	2	1.5	3	5.25	1	0
59	1	1	48	1	2	0	0	0	0	1	0	0	18.9815	0	1	0	2322.25	103.79	86.34	11710.3	126.28	89.275	61.44	3.56	15.91	35.0498	0.276049	1	419.669	1	26.9267	2	122.727	3	82.5194	1	0	2	0.75	1	0
60	0	2	63	0	2	1	1	10	0	2	1	0	14.4231	1	0	0	2469.02	108.7	105.18	11749.5	174.33	71.425	50.05	2.75	19.14	42.5702	0.277247	3	835.466	3	337.411	2	122.727	3	164.527	2	1.5	2	0.75	2	7.9996
60	1	2	64	0	1	1	0	2	0	2	1	1	26.8252	0	0	0	2685.72	94.23	160.04	19981.9	89.52	78.925	85.59	2.33	17.47	49.7261	0.277052	2	637.314	2	169.168	2	122.727	2	82.5194	2	1.5	2	0.75	2	7.9996
61	1	2	59	0	1	0	0	4	0	2	1	1	26.0775	0	0	0	1601.9	39.5	79.06	3183.53	50.55	71.425	40.48	1	7.04	27.156	0.278042	1	419.669	1	26.9267	1	60.432	1	26.3893	1	0	1	0	1	0
61	0	2	65	0	1	1	1	0	0	2	0	0	18.902	0	0	0	2876.38	120.66	150.14	18508.4	261.48	125	64.84	4.28	19.84	51.7593	0.277909	2	637.314	1	26.9267	3	237.914	3	164.527	1	0	1	0	1	0
62	0	2	57	0	1	1	0	1	1	1	0	0	23.8085	0	0	0	1095.38	48.11	30.51	12690.3	95.97	13.4	20.42	1.65	7.28	34.7971	0.281404	2	637.314	1	26.9267	3	237.914	3	164.527	2	1.5	1	0	1	0
62	1	2	68	0	1	1	0	1	1	2	0	0	22.1701	0	0	0	3426.05	114.28	183.21	7556.66	140.91	0	38.5	4.37	19.71	29.8285	0.281399	1	419.669	2	169.168	1	60.432	3	164.527	2	1.5	3	5.25	2	7.9996
63	1	2	67	0	1	0	1	1	0	1	0	1	25	1	0	0	3195.63	52.22	238.17	5322.74	80.45	125	129.82	1.88	12.32	40.2359	0.282155	1	419.669	1	26.9267	1	60.432	1	26.3893	1	0	2	0.75	1	0
63	0	2	61	0	1	1	0	0	1	1	0	0	22.0934	0	0	1	1925.18	91.85	96.6	7735.94	136.38	142.5	46.77	2.63	13.96	41.3432	0.282125	2	637.314	2	169.168	2	122.727	3	164.527	2	1.5	2	0.75	2	7.9996
64	0	2	59	0	2	1	0	1	0	2	0	0	20.5282	0	0	0	1441.11	53.98	64.58	4533.89	31.53	125	42.19	1.73	8.73	38.5654	0.284594	2	637.314	2	169.168	1	60.432	2	82.5194	1	0	3	5.25	1	0
64	1	2	65	0	1	1	0	2	0	2	1	0	20.7422	0	0	0	2713.42	131.75	95.67	30966	305.06	125	64.6	4.26	20.98	40.785	0.284549	3	835.466	1	26.9267	3	237.914	3	82.5194	2	1.5	2	0.75	2	7.9996
65	1	1	57	1	1	0	0	0	0	1	0	1	24.2436	0	0	0	4005.81	183.95	115.84	28761.8	312.65	178.575	59.72	6.09	30.14	54.6821	0.285132	1	419.669	1	26.9267	2	122.727	1	26.3893	1	0	2	0.75	2	7.9996
65	0	2	62	0	2	1	1	2	0	1	1	0	20.7922	0	0	0	2063.37	70.76	96.28	10417	126.24	35.725	46.91	2.47	12.47	45.4205	0.285142	2	637.314	2	169.168	2	122.727	3	164.527	2	1.5	3	5.25	2	7.9996
66	1	1	61	0	2	1	0	1	0	2	0	0	22.7903	0	0	0	3601.58	129.24	167.74	16753.3	438.48	107.15	44.86	3.59	21.24	30.5908	0.288688	3	835.466	2	169.168	3	237.914	3	164.527	3	7	1	0	1	0
66	0	2	60	0	2	1	1	1	1	2	0	1	25.6172	0	0	0	1553.41	91.38	96.38	3284.59	105.47	125	43.4	2.56	11.33	34.6731	0.288698	3	835.466	3	337.411	2	122.727	2	82.5194	2	1.5	3	5.25	1	0
67	1	2	63	0	2	1	1	0	0	1	0	0	23.594	0	0	1	2160.81	105.86	68.34	23270.2	225.61	53.575	66.99	4.25	16.47	44.3025	0.289867	3	835.466	3	337.411	3	237.914	3	164.527	3	7	1	0	1	0
67	0	2	62	0	2	1	1	0	1	2	0	0	19.6357	0	0	0	1949.01	107.54	61.97	35673.1	533.02	187.5	50.09	2.98	20.27	51.0791	0.289864	3	835.466	3	337.411	3	237.914	3	164.527	1	0	2	0.75	2	7.9996
68	0	2	64	0	1	0	0	0	0	2	0	0	22.8235	0	0	0	2357.42	100.87	128.21	15850.4	191.9	125	38.98	2.67	15.34	43.4291	0.2905	2	637.314	3	337.411	3	237.914	1	26.3893	3	7	2	0.75	1	0
68	1	2	70	0	1	0	0	0	0	1	0	1	26.7185	1	0	0	3631.57	134.2	236.89	68987.2	444.15	0	153.92	3.65	62.71	33.3502	0.290378	2	637.314	1	26.9267	3	237.914	1	26.3893	1	0	1	0	1	0
69	0	1	57	0	2	1	0	2	0	2	1	1	24.9121	1	0	0	2709.61	95.31	110.49	4394.15	95.71	178.575	26.06	2.43	16.55	28.7804	0.290533	1	419.669	1	26.9267	1	60.432	1	26.3893	2	1.5	2	0.75	2	7.9996
69	1	2	70	0	1	0	0	0	0	1	0	1	26.7185	0	0	0	3631.57	134.2	236.89	68987.2	444.15	0	153.92	3.65	20.48	33.3502	0.290378	2	637.314	1	26.9267	3	237.914	1	26.3893	1	0	1	0	1	0
70	1	2	68	0	2	1	0	0	0	2	0	1	26.8923	0	0	0	3161.35	109.83	167.17	14674.3	165.13	89.275	98.44	3.6	18.53	54.2392	0.292312	1	419.669	1	26.9267	2	122.727	2	82.5194	1	0	1	0	1	0
70	0	2	61	0	1	1	1	1	0	2	0	0	19.6875	0	0	0	1678.29	95.1	89.19	10249.4	123.4	125	53.64	3.48	13.08	33.298	0.292312	3	835.466	3	337.411	2	122.727	3	82.5194	3	7	3	5.25	1	0
71	0	2	58	0	2	1	0	0.5	0	2	0	1	24.0385	0	0	0	1015.42	40.65	27.31	17820	87.82	125	18.91	1.32	6.92	29.9272	0.29345	2	637.314	1	26.9267	3	237.914	3	164.527	1	0	2	0.75	1	0
71	1	2	62	0	1	0	0	0	0	2	0	1	28.3447	1	0	0	1864.84	85.85	86.06	10719.6	153.56	0	33.93	3.29	13.31	32.881	0.293368	2	637.314	1	26.9267	3	237.914	3	164.527	1	0	1	0	1	0
72	1	1	56	1	1	1	0	3	1	2	1	0	22.9877	0	0	0	2395.29	78.08	99.8	3903.94	64.97	71.4285	49.67	1.9	12.36	37.033	0.294808	1	419.669	2	169.168	1	60.432	2	82.5194	3	7	1	0	1	0
72	0	2	65	0	2	1	1	4	0	2	1	1	24.9403	0	0	0	2467.58	99.79	114.3	36273.9	500.87	125	79.41	3.94	16.24	41.4607	0.294743	3	835.466	1	26.9267	3	237.914	3	164.527	1	0	3	5.25	1	0
73	0	2	62	0	2	0	1	2	0	2	1	1	25.4178	0	0	0	1804.17	109.5	74.24	2952	64.84	89.275	58.82	3.05	12.52	29.5685	0.29591	3	835.466	3	337.411	1	60.432	3	164.527	3	7	2	0.75	1	0
73	1	2	61	0	1	0	0	1	0	1	0	0	21.5287	0	0	0	1595.98	36.99	80.83	3193.71	56.94	35.725	45.73	1.04	6.93	29.0538	0.295756	1	419.669	1	26.9267	1	60.432	1	26.3893	1	0	1	0	1	0
74	0	2	61	1	1	0	0	0	1	2	0	1	26.398	0	0	1	1583.14	92.98	55.35	4792.58	79.75	250	23.76	2.71	14.65	43.4807	0.296295	3	835.466	3	337.411	1	60.432	1	26.3893	3	7	3	5.25	1	0
74	1	2	62	0	1	1	1	2	1	2	1	0	22.1875	1	0	0	1805.27	90.39	69.06	8859.53	253.05	125	36.01	2.95	15.31	43.6051	0.295864	3	835.466	2	169.168	3	237.914	3	164.527	1	0	1	0	2	7.9996
75	1	2	58	1	1	1	0	0	1	2	0	0	21.4912	0	0	0	2119.77	62.79	147.67	8644.29	132.92	125	46.52	1.21	10.38	22.4531	0.29601	1	419.669	1	26.9267	2	122.727	1	26.3893	1	0	1	0	1	0
75	0	2	62	0	2	1	0	2	1	2	1	1	24.9403	0	0	0	1777.47	69.89	59.96	14444.3	195.01	71.425	38.43	2.88	12.05	50.6742	0.297032	2	637.314	1	26.9267	3	237.914	3	164.527	1	0	1	0	1	0
76	1	1	54	1	2	1	0	0	0	1	0	1	25.5943	0	0	0	1925	81	85.02	15139.8	185.11	125	42.35	2.43	13.26	36.2341	0.296763	3	835.466	3	337.411	3	237.914	3	164.527	3	7	3	5.25	1	0
76	0	2	59	0	2	1	0	0.5	0	2	0	1	26.2891	0	0	1	1131.92	45.29	59.5	2645.39	39.81	89.275	21.57	1.56	7.93	48.1358	0.297451	1	419.669	1	26.9267	2	122.727	3	164.527	2	1.5	2	0.75	1	0
77	1	1	64	0	2	1	0	4	1	2	1	0	22.4653	0	0	1	4026.84	110.4	212.78	9060.41	189.42	125	102	4.04	19.89	41.3862	0.297472	1	419.669	2	169.168	1	60.432	2	82.5194	3	7	1	0	1	0
77	0	2	61	0	1	1	0	0	0	2	0	0	22.0661	0	0	0	1539.05	65.46	45.56	7984.44	96.92	35.725	23.61	1.95	10.09	30.7919	0.298151	2	637.314	2	169.168	2	122.727	3	164.527	1	0	3	5.25	2	7.9996
78	1	1	56	0	2	1	1	0	0	1	0	1	27.0416	0	0	0	2316.38	81.73	72.7	12079.7	176.57	125	40.73	2.3	13.77	33.0969	0.298126	2	637.314	2	169.168	2	122.727	3	82.5194	3	7	2	0.75	1	0
78	0	2	64	0	2	1	1	4	0	2	1	0	16.5889	1	0	0	2146.91	62.53	111.06	7716.66	151.54	17.85	64.63	1.79	11.8	42.2859	0.299323	3	835.466	3	337.411	3	237.914	2	82.5194	3	7	3	5.25	1	0
79	1	2	61	0	1	0	0	1	0	2	0	1	28.1969	0	1	0	1526.1	62.31	78.3	10465.7	78.07	26.775	29.19	1.55	12.57	33.9782	0.298698	3	835.466	3	337.411	2	122.727	1	26.3893	1	0	2	0.75	2	7.9996
79	0	2	62	0	2	1	1	1	0	2	0	1	27.8516	0	1	0	1716.04	54.99	74.38	11326	179.96	125	38.3	1.67	9.91	47.7657	0.299624	2	637.314	2	169.168	3	237.914	1	26.3893	2	1.5	2	0.75	1	0
80	1	1	57	0	2	1	0	0.5	0	2	0	1	26.1545	0	0	0	2492.39	94.28	82.75	5012.48	120.44	125	41.56	2.02	14.62	41.8092	0.29964	2	637.314	2	169.168	2	122.727	1	26.3893	3	7	2	0.75	1	0
80	0	1	55	1	2	1	0	3	0	2	1	0	22.4387	0	0	0	2065.91	98.47	74.41	10587.3	148.15	125	29.87	1.81	12.04	25.4881	0.299756	3	835.466	3	337.411	3	237.914	1	26.3893	3	7	2	0.75	2	7.9996
81	1	2	62	0	2	1	0	2	0	2	1	1	30.1562	0	0	0	1702.08	70.16	78.63	16479.6	108.76	53.575	42.44	1.83	10.88	31.94	0.300215	1	419.669	1	26.9267	3	237.914	1	26.3893	2	1.5	2	0.75	1	0
81	0	2	62	0	2	1	0	1	1	2	0	0	20.5979	0	0	0	1707.92	88.79	71.85	7314.59	109.33	107.15	46.37	2.24	11.9	44.1944	0.299968	2	637.314	2	169.168	2	122.727	2	82.5194	1	0	3	5.25	1	0
82	0	2	66	0	2	1	0	4	0	2	1	0	21.7738	0	0	0	2492.39	95.83	88.42	17279.2	212.61	125	47.14	3.17	14.64	53.537	0.302641	3	835.466	3	337.411	3	237.914	3	164.527	3	7	2	0.75	2	7.9996
82	1	2	73	0	1	0	1	0	0	2	0	0	23.1992	0	1	0	3978.51	149.45	98.04	25235.1	197.82	0	53.1	5.2	25.77	45.6699	0.302512	2	637.314	2	169.168	1	60.432	2	82.5194	1	0	2	0.75	2	7.9996
83	0	2	65	0	2	1	0	1	1	2	0	1	25.4341	0	0	0	2267.38	72.74	125.1	8867.7	159.45	125	38.39	2.05	10.78	36.1478	0.303201	2	637.314	3	337.411	1	60.432	1	26.3893	3	7	3	5.25	1	0
83	1	2	63	0	1	0	0	2	0	2	1	0	20.0288	0	0	0	1848.15	32.91	117.66	5019.5	82.21	35.725	63.55	1.06	6.85	26.0061	0.303009	1	419.669	1	26.9267	2	122.727	1	26.3893	2	1.5	2	0.75	1	0
84	1	2	62	0	1	0	0	2	0	1	1	1	29.604	0	0	0	1632.45	51.1	85.68	8836.96	84.31	53.575	37.34	1.32	9.27	31.8594	0.303172	2	637.314	2	169.168	2	122.727	2	82.5194	3	7	1	0	1	0
84	0	2	67	0	1	1	0	0	0	1	0	1	24.9581	0	1	1	2678.99	118.99	85.42	36058.3	542.07	8.925	69.68	3.92	16.8	35.4442	0.303717	3	835.466	2	169.168	3	237.914	1	26.3893	3	7	3	5.25	1	0
85	1	2	70	0	1	1	0	2	1	2	1	0	19.4898	0	1	0	3303.74	108.42	147.59	19760.3	248.76	125	55.57	3.55	22.53	56.5764	0.30418	2	637.314	3	337.411	3	237.914	1	26.3893	2	1.5	2	0.75	2	7.9996
85	0	2	64	0	2	1	1	0	1	2	0	0	23.6625	0	0	0	2035.59	139.42	91.74	10324.6	203.36	187.5	53.03	3.26	17.92	47.9355	0.30405	3	835.466	1	26.9267	3	237.914	3	164.527	1	0	1	0	1	0
86	0	2	61	0	2	1	0	2	1	2	1	1	25.9708	0	0	0	1375.04	54.98	46.13	28683.4	215.49	0	20.06	1.92	9.38	25.2	0.305115	3	835.466	3	337.411	3	237.914	3	164.527	1	0	3	5.25	1	0
86	1	2	69	0	1	1	1	2	1	1	1	1	26.0375	1	0	1	3072.32	153.05	101.62	15341.8	291.25	125	49.35	4.16	30.2	39.0388	0.305015	2	637.314	3	337.411	2	122.727	1	26.3893	1	0	3	5.25	2	7.9996
87	1	2	63	0	2	0	0	0	0	1	0	1	32.4246	0	0	0	1773.97	79.69	83.22	4475.27	84.43	125	51.62	2.15	11.54	33.6719	0.306176	1	419.669	1	26.9267	1	60.432	2	82.5194	1	0	2	0.75	1	0
87	0	2	64	0	1	1	1	2	1	2	1	1	26.2227	0	1	0	1982.26	84.54	94.18	2744	102.21	89.275	37.31	1.68	15.41	23.4049	0.306329	2	637.314	3	337.411	1	60.432	1	26.3893	3	7	2	0.75	1	0
88	0	1	58	1	2	0	0	1	0	2	0	1	29.0947	0	0	0	2517.06	70.05	66.28	5052.67	57.98	8.925	31.33	2.02	11.89	36.556	0.307618	1	419.669	1	26.9267	1	60.432	1	26.3893	1	0	1	0	1	0
88	1	2	56	1	1	1	1	0	0	1	0	0	22.8245	0	0	0	1423.54	86.19	74.23	16273.8	149.14	0	38.03	2.06	14.46	25.1796	0.307583	2	637.314	1	26.9267	3	237.914	3	164.527	1	0	1	0	1	0
89	0	2	64	0	2	1	0	2	0	2	1	0	23.7109	0	0	0	1949.2	59.84	68.75	15363.8	107.15	125	31.92	1.77	10.97	44.8002	0.307747	2	637.314	3	337.411	1	60.432	1	26.3893	3	7	1	0	1	0
89	1	2	67	0	2	0	0	1	1	2	0	1	27.5312	0	0	1	2581.18	98.21	91.47	28425.6	389.59	12.5	75.21	4.31	19.46	62.4834	0.307902	3	835.466	1	26.9267	3	237.914	3	164.527	1	0	1	0	1	0
90	1	2	62	0	2	0	0	0	0	1	0	1	25.1953	0	0	0	1500.12	61.75	67.86	13177.1	170.47	13.4	55.2	1.94	10.02	41.0595	0.308836	2	637.314	1	26.9267	3	237.914	1	26.3893	1	0	1	0	1	0
90	0	2	61	0	1	1	1	2	0	1	1	1	24.2664	0	0	0	1279.92	33.14	54.45	2782	38.08	17.85	25.15	0.97	5.46	34.3933	0.309195	1	419.669	1	26.9267	1	60.432	1	26.3893	1	0	2	0.75	1	0
91	0	2	63	0	1	1	0	2	0	2	1	0	20.0773	0	0	0	1691.34	69.02	62.36	17746.8	257.77	71.425	32.11	2.41	12.25	46.7041	0.309725	3	835.466	2	169.168	3	237.914	3	164.527	3	7	2	0.75	2	7.9996
91	1	2	71	0	1	0	0	0.3	0	1	0	0	21.3507	0	0	0	3401.7	136.81	126.3	16123.3	347.32	125	48.3	5.12	22.48	46.8618	0.309061	3	835.466	1	26.9267	2	122.727	3	164.527	2	1.5	2	0.75	1	0
92	1	2	63	0	2	0	0	0	0	2	0	1	31.2092	0	0	0	1690.11	42.58	87.26	2617.5	38.81	53.575	32.21	1.25	7.03	26.0828	0.309778	2	637.314	3	337.411	1	60.432	1	26.3893	3	7	1	0	1	0
92	0	2	64	0	2	1	0	0.5	1	2	0	1	27.024	0	1	1	1901.43	88.78	71.69	14012.4	149.91	125	35.97	2.84	14.19	52.608	0.309802	3	835.466	2	169.168	3	237.914	3	164.527	3	7	1	0	1	0
93	1	2	62	0	2	1	1	0	0	2	0	0	22.0317	1	0	0	1465.13	51.07	63.07	14566.6	245.28	8.925	34.57	1.83	8.1	50.4568	0.310344	1	419.669	1	26.9267	3	237.914	3	82.5194	1	0	1	0	1	0
93	0	1	61	0	2	1	0	4	0	2	1	1	26.7401	0	0	0	3077.51	115.97	115.22	21047.3	196.51	4.475	55.44	3.54	19.5	55.3541	0.310854	3	835.466	2	169.168	3	237.914	1	26.3893	3	7	1	0	2	7.9996
94	1	2	71	0	1	1	0	0	0	2	0	1	27.0134	1	1	0	3363.79	144.1	186.04	19217.1	277.41	22.325	102.68	4.47	19.7	55.1843	0.310695	2	637.314	1	26.9267	2	122.727	3	164.527	2	1.5	2	0.75	1	0
94	0	1	62	0	1	1	0	0	0	2	0	0	23.9144	0	0	1	3288.35	157.53	161.97	19474.7	182.44	125	80.89	4.9	27.46	55.0076	0.310898	3	835.466	3	337.411	2	122.727	2	82.5194	2	1.5	3	5.25	2	7.9996
95	1	2	67	0	2	0	0	0	0	1	0	0	21.9899	1	0	0	2500.57	124.77	176.09	4299.34	52.22	10.725	83.59	2.96	14.88	45.5919	0.311376	1	419.669	1	26.9267	1	60.432	2	82.5194	2	1.5	2	0.75	1	0
95	0	2	62	0	1	1	0	6	0	2	1	0	21.1203	0	0	0	1441.62	35.11	77.66	4990.99	74.64	89.275	45.72	1.24	6.2	41.383	0.311359	1	419.669	2	169.168	2	122.727	1	26.3893	2	1.5	3	5.25	1	0
96	1	1	51	1	2	1	0	0	1	2	0	1	26.6782	0	0	0	2096.36	71.07	94.46	3223.86	38.59	250	27.94	1.22	12.06	31.7807	0.312061	1	419.669	2	169.168	1	60.432	1	26.3893	2	1.5	3	5.25	1	0
96	0	2	65	0	2	1	0	0	0	2	0	1	26.1393	0	0	0	2032.53	69.55	85.8	16304.4	74.08	125	53.2	2.62	11.73	24.7013	0.313294	2	637.314	2	169.168	1	60.432	2	82.5194	1	0	3	5.25	1	0
97	1	2	60	0	1	0	0	0	0	1	0	1	29.6158	0	0	1	966.11	44.36	49.24	27870.2	143.58	0	51.47	1.48	7.28	36.7734	0.313601	3	835.466	1	26.9267	3	237.914	3	164.527	1	0	1	0	1	0
97	0	2	64	0	1	1	0	1	0	2	0	1	24.8192	0	0	1	1815.95	68.44	72.66	7596.53	114.33	250	36.51	2.93	11.01	38.0881	0.313498	2	637.314	2	169.168	2	122.727	3	164.527	3	7	1	0	1	0
98	1	2	69	0	1	1	0	0	1	2	0	0	16.4609	0	0	1	2843.87	100.84	127.36	10689.4	234.56	71.425	60.44	3.99	16.95	37.0694	0.314863	2	637.314	1	26.9267	2	122.727	3	164.527	2	1.5	2	0.75	1	0
98	0	1	57	0	2	1	0	0.5	0	2	0	1	25.9233	0	0	0	2143.44	61.12	66.94	4931.29	86.36	89.275	32.24	1.89	11.28	33.2012	0.314605	1	419.669	1	26.9267	1	60.432	2	82.5194	2	1.5	1	0	1	0
99	0	2	63	0	1	1	0	2	0	2	1	0	20.0773	0	0	0	1561.88	66.37	43.06	17834.4	279.79	71.425	26.6	2.64	11.66	48.5883	0.315332	3	835.466	2	169.168	3	237.914	3	164.527	3	7	2	0.75	2	7.9996
99	1	2	73	0	1	1	0	2	0	2	1	0	17.1875	0	0	0	3682.57	153.38	163.53	39868.5	293.12	35.725	100.28	4.73	23.72	42.0315	0.315244	3	835.466	2	169.168	3	237.914	2	82.5194	3	7	2	0.75	1	0
100	1	2	66	0	1	1	0	0	0	2	0	1	26.2155	0	1	0	2178.08	95.18	92.39	62560.7	319.82	125	58.23	2.81	16.15	50.3335	0.316177	3	835.466	1	26.9267	3	237.914	2	82.5194	1	0	1	0	1	0
100	0	2	62	0	1	0	0	3	1	1	1	0	22.1118	0	0	0	1332.26	50.11	65.01	14982.4	166.71	4.475	38.91	2.08	8.62	46.2071	0.316105	2	637.314	1	26.9267	3	237.914	3	164.527	2	1.5	1	0	2	7.9996
101	1	1	53	0	2	1	0	0	0	1	0	1	24.9649	1	0	0	1257.36	37.54	62.68	1527.53	12.68	6.425	24.89	0.98	7.33	36.2185	0.316286	1	419.669	1	26.9267	1	60.432	1	26.3893	1	0	1	0	1	0
101	0	1	59	0	2	1	0	0	0	1	0	0	21.8227	0	0	1	2507.81	96.65	98.4	6028.12	109.98	125	41.17	2.28	14.51	28.2283	0.317191	2	637.314	2	169.168	2	122.727	1	26.3893	3	7	2	0.75	1	0
102	1	2	72	0	1	1	0	2	0	2	1	1	28.5536	0	0	0	3444.24	110.28	187.52	8212.95	141.35	125	78.68	3.8	18.54	52.3367	0.316397	3	835.466	3	337.411	1	60.432	3	164.527	3	7	3	5.25	1	0
102	0	1	56	1	1	1	0	6	0	2	1	0	21.3058	0	0	1	3025.48	217.45	115.51	38065.5	373.13	53.5725	102.15	7.73	28.73	39.0951	0.317724	3	835.466	1	26.9267	3	237.914	3	164.527	1	0	1	0	1	0
103	0	1	61	0	2	1	0	1	0	2	0	0	18.4775	0	0	0	2908.34	98.86	62.37	4484.81	98.64	89.275	28.16	2.3	15.71	23.6305	0.318205	1	419.669	1	26.9267	1	60.432	1	26.3893	2	1.5	1	0	1	0
103	1	2	60	0	2	0	0	0	0	2	0	0	18.3655	0	0	0	888.39	42.77	53.1	8574.22	53.88	53.575	46.16	1.08	8.24	29.766	0.316983	1	419.669	1	26.9267	2	122.727	1	26.3893	1	0	1	0	1	0
104	0	2	64	0	2	1	1	0	0	2	0	0	22.0285	0	0	1	1701.09	52.69	93.42	3024.01	51.15	125	36.46	1.4	9.74	39.6746	0.318502	1	419.669	3	337.411	1	60.432	2	82.5194	2	1.5	3	5.25	1	0
104	1	2	70	0	1	1	0	3	0	2	1	1	24.1797	0	0	0	2983.43	86.67	161.03	12614.2	186.44	125	81.29	2.77	17.52	45.3771	0.318015	1	419.669	3	337.411	2	122.727	1	26.3893	2	1.5	2	0.75	2	7.9996
105	1	1	53	1	1	0	1	7	1	1	1	0	20.6428	0	0	0	2381.72	73.8	104.23	11485.1	99.16	53.575	44.39	2	11.31	25.6453	0.31808	1	419.669	1	26.9267	2	122.727	1	26.3893	2	1.5	1	0	1	0
105	0	1	60	1	2	1	0	1	0	2	0	1	24.4898	0	1	0	2689.65	107.49	118.16	10144.3	175.97	107.15	58.85	4.14	17.45	53.0781	0.318504	2	637.314	2	169.168	2	122.727	3	164.527	1	0	3	5.25	1	0
106	0	1	55	1	2	0	0	0	0	1	0	1	24.098	0	0	0	2787.43	108.72	100.18	6970.53	51.68	17.85	37.63	2.49	16.09	34.2122	0.318869	2	637.314	3	337.411	1	60.432	1	26.3893	3	7	3	5.25	1	0
106	1	2	61	0	1	0	0	0	0	1	0	0	20.9957	0	0	0	1056.1	25.14	52.19	7001.05	55.34	0	26.55	1.04	6.42	42.2546	0.318913	1	419.669	1	26.9267	2	122.727	1	26.3893	1	0	1	0	1	0
107	1	2	60	0	2	1	0	0	1	2	0	0	21.1598	0	0	0	829.32	19.48	31.53	9791.43	100.08	0	22.4	1.04	5.71	38.5181	0.319566	2	637.314	1	26.9267	3	237.914	2	82.5194	1	0	1	0	1	0
107	0	1	54	1	1	1	0	0	0	2	0	1	25.5017	0	0	0	2562.1	111.2	153.95	6506.14	106.86	125	43.75	2.36	16.47	40.2034	0.319459	3	835.466	3	337.411	1	60.432	1	26.3893	3	7	2	0.75	1	0
108	0	2	61	0	2	1	1	2	0	2	1	0	21.0019	0	0	0	1019.19	38.35	54.63	5336.85	98.25	125	15.21	0.94	6.44	31.4556	0.320531	1	419.669	1	26.9267	3	237.914	1	26.3893	1	0	1	0	1	0
108	1	2	66	0	1	1	0	0	0	2	0	0	19.23	0	0	0	2075.53	90.58	74.64	11714.2	104.72	0	51.47	3.47	14.91	38.641	0.320663	3	835.466	3	337.411	2	122.727	3	164.527	3	7	1	0	1	0
109	0	1	56	0	2	1	0	2	1	2	1	0	23.1834	0	0	0	1782.19	72.62	87.41	3701.31	38.13	125	27.62	1.65	11.61	38.619	0.321134	3	835.466	3	337.411	1	60.432	1	26.3893	3	7	3	5.25	1	0
109	1	2	63	0	1	0	0	3	0	1	1	0	17.4609	0	0	0	1426.67	40.84	60.08	2863.04	57.53	0	25.47	1.09	9.26	39.2297	0.321245	2	637.314	3	337.411	1	60.432	2	82.5194	1	0	1	0	2	7.9996
110	0	1	60	1	1	0	0	7	0	1	1	0	17.562	0	0	0	2608.41	59.13	94.2	4239.12	66.44	53.575	54.13	1.45	10.13	34.8041	0.322069	1	419.669	1	26.9267	1	60.432	1	26.3893	2	1.5	2	0.75	1	0
110	1	2	65	0	1	1	1	4.5	1	2	1	1	25.2734	0	0	0	1832.87	80.51	59.24	8251.35	112.1	89.275	26.33	2.08	11.56	33.1631	0.322016	2	637.314	3	337.411	2	122.727	2	82.5194	3	7	1	0	1	0
111	0	1	66	0	1	1	0	0	0	1	0	1	28.6869	0	0	0	3843.26	129.56	132.58	22417	514.14	89.275	60.25	5.57	23.65	44.9349	0.323671	3	835.466	3	337.411	3	237.914	3	164.527	3	7	3	5.25	1	0
111	1	2	65	0	1	1	1	2	0	2	1	1	24.7659	0	0	0	1807.9	50.07	85.54	8259.97	94.78	107.15	45.29	1.58	9.62	43.3612	0.323116	1	419.669	1	26.9267	2	122.727	2	82.5194	2	1.5	1	0	1	0
112	0	1	59	0	1	1	0	0	0	2	0	0	22.4367	0	0	0	2330.18	36.96	191.55	7011.72	112.92	8.925	95.09	1.32	8.83	43.3413	0.324996	1	419.669	1	26.9267	2	122.727	1	26.3893	2	1.5	2	0.75	1	0
112	1	2	69	0	1	1	0	1	0	2	0	0	22.3828	0	0	0	2643.67	90.66	122.22	4050.15	84.57	0	51.94	2.6	14.63	25.4062	0.323632	1	419.669	1	26.9267	1	60.432	2	82.5194	1	0	1	0	1	0
113	0	2	68	0	1	1	0	0	0	1	0	0	22.232	0	0	0	2369.03	84.87	100.08	12505.2	254.2	125	41.35	2.79	13.77	42.9403	0.326408	3	835.466	3	337.411	3	237.914	3	164.527	3	7	3	5.25	1	0
113	1	2	63	0	1	0	1	0	0	2	0	0	22.5074	0	1	0	1346.65	46.54	51.55	6920.69	80.01	71.425	30.07	1.35	7.63	50.7493	0.324772	1	419.669	1	26.9267	2	122.727	1	26.3893	1	0	1	0	1	0
114	1	2	62	0	1	1	0	2.5	0	1	1	0	19.5721	1	0	0	1128.48	21.13	66.88	842.02	17.84	17.85	38.44	0.55	4.21	24.534	0.325051	1	419.669	1	26.9267	1	60.432	2	82.5194	1	0	1	0	1	0
114	0	2	67	0	2	1	0	0	0	2	0	1	24.1672	0	1	0	2123.14	92.06	100.02	6436.89	59.62	214.275	32.69	2.77	14.13	46.5802	0.327917	1	419.669	1	26.9267	1	60.432	2	82.5194	1	0	2	0.75	2	7.9996
115	1	2	70	0	1	0	0	0	0	2	0	1	25.2082	0	0	0	2805.07	113.01	157.59	9735.99	162.06	125	75.82	4.81	15.75	38.4155	0.325863	2	637.314	1	26.9267	1	60.432	2	82.5194	1	0	1	0	1	0
115	0	2	69	0	1	1	0	0	0	2	0	1	24.0933	0	0	1	2531.22	138.95	114.5	15103.8	140.88	160.725	53.5	4.19	24.24	47.0621	0.328613	2	637.314	3	337.411	2	122.727	2	82.5194	3	7	1	0	1	0
116	1	2	64	0	1	0	0	5	0	2	1	0	20.6758	0	0	0	1510.11	61.43	58.27	17203.2	294.54	125	27.23	1.9	9.92	46.4239	0.326916	2	637.314	2	169.168	3	237.914	2	82.5194	2	1.5	2	0.75	1	0
116	0	2	67	0	2	1	1	1	0	2	0	1	25.1821	0	0	0	2091.27	91.74	59.39	14719.3	242.02	125	39.53	3.77	14.3	49.3661	0.329335	3	835.466	3	337.411	3	237.914	3	164.527	3	7	2	0.75	1	0
117	1	2	64	2	2	0	0	0	0	1	0	0	20.898	0	0	0	1498.77	76.74	57.57	62959.7	234.02	53.575	28.99	1.71	17.57	26.5325	0.327419	3	835.466	3	337.411	3	237.914	1	26.3893	1	0	3	5.25	2	7.9996
117	0	1	60	1	2	0	1	1	0	2	0	0	20.7613	0	0	0	3601.36	147.08	131.9	21781.3	241.45	0	70.58	4.9	20.55	66.4904	0.329707	2	637.314	2	169.168	3	237.914	2	82.5194	3	7	1	0	1	0
118	0	1	71	0	2	1	0	0	0	2	0	1	28.4532	0	0	0	4754.61	265.5	274.12	20223.2	184.36	125	115.53	5.05	41.34	56.2296	0.330234	2	637.314	2	169.168	2	122.727	2	82.5194	3	7	3	5.25	1	0
118	1	1	63	0	1	1	0	0	0	1	0	0	16.8941	0	0	0	3116.07	151.81	125.8	11571.9	136.8	0	97.3	4.74	19.06	42.7272	0.327725	2	637.314	1	26.9267	2	122.727	3	164.527	2	1.5	1	0	1	0
119	1	1	61	0	2	1	0	0	0	2	0	1	27.3438	0	1	0	2689.65	107.49	118.16	10144.3	175.97	107.15	58.85	4.14	17.45	45.5781	0.327844	2	637.314	2	169.168	2	122.727	3	164.527	1	0	3	5.25	1	0
119	0	1	59	1	2	1	0	1	1	2	0	1	27.828	0	0	0	2189.02	63.2	128.15	5353.1	78.69	125	47.43	1.52	11.16	38.6263	0.331269	1	419.669	3	337.411	1	60.432	1	26.3893	3	7	2	0.75	1	0
120	0	1	62	1	2	1	0	2	0	2	1	1	28.2353	0	0	0	3981.14	189.87	163.13	19329.5	235.92	178.575	54.82	6.03	24.45	36.4175	0.331668	2	637.314	2	169.168	2	122.727	3	164.527	2	1.5	3	5.25	1	0
120	1	1	59	1	2	1	0	6	0	2	1	0	23.91	0	0	0	2259.34	56.4	117.16	5142.22	70.65	35.725	53.68	1.33	10.04	26.7246	0.328136	1	419.669	1	26.9267	1	60.432	1	26.3893	1	0	1	0	1	0
121	1	2	63	0	1	1	0	7	0	1	1	0	22.9218	0	0	0	1245.34	28.71	68.7	2890.93	52.47	13.4	39.25	0.84	5.93	26.8235	0.329266	1	419.669	1	26.9267	1	60.432	2	82.5194	1	0	1	0	1	0
121	0	1	62	0	2	1	1	0	0	2	0	1	24.6918	0	0	0	2786.29	95.46	105.29	5207.42	155.61	35.725	42.3	2.47	21.01	34.8907	0.332983	2	637.314	3	337.411	1	60.432	2	82.5194	3	7	2	0.75	2	7.9996
122	1	1	63	1	1	1	0	3	0	2	1	1	24.8016	1	0	0	3081.04	138.31	141.96	18778.7	138.51	17.85	42.43	4.23	17.31	51.7632	0.329282	1	419.669	1	26.9267	2	122.727	1	26.3893	1	0	2	0.75	1	0
122	0	2	65	0	1	1	1	2	1	2	1	1	26.9149	0	0	0	1582.95	66.99	50.88	11304.5	101.25	89.275	26.18	1.83	14.25	33.2714	0.333111	3	835.466	3	337.411	2	122.727	3	164.527	2	1.5	2	0.75	2	7.9996
123	1	1	72	1	2	1	0	0	0	2	0	0	20.9042	0	0	0	4969.28	184.62	272.49	30055.6	307.22	250	154.58	7.1	27	50.3084	0.330109	2	637.314	1	26.9267	2	122.727	2	82.5194	2	1.5	2	0.75	1	0
123	0	2	65	0	2	1	1	0	0	2	0	0	22.6562	0	0	0	1573.46	56.43	67.32	5895.34	75.21	142.85	34.55	1.28	8.73	35.9601	0.333537	1	419.669	2	169.168	2	122.727	2	82.5194	3	7	2	0.75	1	0
124	0	1	61	1	1	0	0	4	0	2	1	0	23.4552	0	0	0	2558.89	88.8	75.05	9884.63	156.03	71.425	43.09	2.67	14.43	42.1008	0.333678	1	419.669	1	26.9267	2	122.727	3	164.527	2	1.5	2	0.75	1	0
124	1	1	53	1	2	1	0	0	0	2	0	0	23.9326	0	0	0	2057.62	105.42	82.98	30993.8	198.02	0	55.17	2.7	16.43	46.043	0.332415	2	637.314	1	26.9267	3	237.914	3	164.527	1	0	1	0	1	0
125	1	2	69	0	1	1	1	1	0	2	0	1	28.959	0	0	0	2440.73	100.17	137.5	16422	158.93	71.4285	61.02	3.61	17.02	34.2111	0.33265	2	637.314	2	169.168	2	122.727	2	82.5194	1	0	3	5.25	1	0
125	0	2	65	0	2	1	0	2	0	2	1	1	24.0999	0	0	0	1558.97	64.24	53.42	11904.4	191.41	53.575	24.43	2	10.68	50.4848	0.334186	2	637.314	2	169.168	3	237.914	2	82.5194	1	0	3	5.25	1	0
126	0	2	62	0	2	1	0	0	0	2	0	1	25.2305	0	0	0	922.55	22.35	42.05	10188.9	85.79	0	25.83	0.69	4.75	30.1076	0.334223	2	637.314	1	26.9267	3	237.914	2	82.5194	1	0	1	0	1	0
126	1	2	67	0	1	1	1	0.5	1	2	0	0	22.8329	1	0	0	2010.5	66.22	99.01	14264.5	108.27	0	29.22	1.96	11.58	36.891	0.332941	1	419.669	1	26.9267	2	122.727	1	26.3893	1	0	2	0.75	1	0
127	1	1	67	2	2	0	0	0	0	1	0	0	21.098	0	0	0	3834.44	166.74	126.86	10215.9	127.01	8.925	56.89	8.11	28.1	24.8233	0.333484	1	419.669	2	169.168	1	60.432	1	26.3893	1	0	2	0.75	2	7.9996
127	0	2	66	0	1	1	0	3	1	2	1	0	23.8281	0	0	0	1762.47	55.61	67.31	4789.78	49.68	0	35.59	1.71	9.22	28.6229	0.334561	1	419.669	1	26.9267	1	60.432	2	82.5194	1	0	2	0.75	1	0
128	1	2	68	0	2	1	0	2	1	2	1	0	21.7784	0	0	0	2204.22	129.49	82.54	8953.92	119.95	17.85	43.53	3.74	17.2	36.3193	0.333753	2	637.314	3	337.411	1	60.432	3	164.527	1	0	2	0.75	2	7.9996
128	0	2	63	0	1	1	1	5	1	2	1	1	25.5807	0	0	0	1124.74	61.23	46.82	13014.7	142.89	17.85	38.48	1.95	9.61	38.6467	0.334657	2	637.314	1	26.9267	3	237.914	2	82.5194	1	0	1	0	1	0
129	1	1	55	0	2	1	0	0	0	2	0	1	24.3141	0	0	0	1258.22	17.13	107.04	2395.71	35.23	10	60.19	0.6	4.19	27.5897	0.335	1	419.669	1	26.9267	1	60.432	1	26.3893	2	1.5	2	0.75	2	7.9996
129	0	2	67	0	2	1	0	1	0	2	0	1	27.5781	0	0	0	1960.11	58.04	125.67	6797.85	121.64	125	48.13	1.65	9.69	32.6569	0.3352	1	419.669	2	169.168	2	122.727	1	26.3893	1	0	3	5.25	1	0
130	1	1	56	1	2	1	0	3	0	2	1	1	24.5675	0	0	0	2622.07	79.72	148.37	7378.56	66.12	53.575	69.3	2.27	14.22	38.4056	0.335606	1	419.669	2	169.168	1	60.432	1	26.3893	2	1.5	3	5.25	1	0
130	0	2	66	0	1	1	0	1	0	2	0	1	24.1284	0	1	0	1729.76	55.81	54.31	14252.9	272.92	125	26.36	1.72	9.31	49.5259	0.336031	3	835.466	3	337.411	3	237.914	1	26.3893	3	7	1	0	1	0
131	1	2	58	1	1	1	0	0	1	1	0	1	26.0477	0	0	0	1195.84	52.43	52.88	8238.05	150.07	133.925	34.67	1.46	9.18	47.1629	0.336231	3	835.466	3	337.411	3	237.914	3	164.527	2	1.5	3	5.25	1	0
131	0	1	64	0	2	1	0	0	0	2	0	0	20.0732	1	0	0	3119.6	135.66	126.66	23823	278.23	125	54.59	5.17	22.77	43.1681	0.337043	3	835.466	2	169.168	3	237.914	2	82.5194	2	1.5	2	0.75	2	7.9996
132	0	2	65	0	2	1	1	4	0	2	1	1	24.0779	0	0	0	1476.49	58.42	52.92	5893.11	58.71	35.725	26.36	1.85	9.22	27.1056	0.337895	1	419.669	2	169.168	1	60.432	2	82.5194	2	1.5	2	0.75	2	7.9996
132	1	2	66	0	1	1	1	0	0	1	0	1	27.6042	0	0	0	1691.53	64.07	84.08	5700.54	89.7	125	38.16	1.34	10.47	36.4534	0.337752	3	835.466	3	337.411	2	122.727	1	26.3893	3	7	3	5.25	1	0
133	0	2	70	0	2	1	0	1	0	2	0	1	26.1719	1	1	0	2516.89	88.68	122.74	7243.26	82.77	0	41.96	2.61	12.14	25.947	0.33875	1	419.669	1	26.9267	1	60.432	2	82.5194	1	0	1	0	1	0
133	1	1	57	0	1	1	0	1	0	2	0	0	20.4491	0	0	0	1606.85	73.4	52.66	2349.01	52.79	35.725	28.7	1.6	12.53	23.4524	0.338381	1	419.669	2	169.168	1	60.432	1	26.3893	1	0	2	0.75	2	7.9996
134	0	1	63	0	2	1	0	3	0	2	1	0	21.3068	0	0	0	2863.14	113.82	108.74	2888.74	132.03	125	35.79	3.69	17.92	36.171	0.339054	2	637.314	2	169.168	1	60.432	2	82.5194	2	1.5	2	0.75	2	7.9996
134	1	2	75	0	1	1	0	2	1	2	1	0	23.3594	0	1	1	3567.23	104.48	194.81	15637.3	233.37	125	101.54	3.99	18.62	59.812	0.339156	2	637.314	1	26.9267	3	237.914	1	26.3893	1	0	3	5.25	1	0
135	0	2	63	0	2	0	0	0	0	2	0	0	22.3031	0	0	0	992.33	53.98	31.05	38263.1	250.27	125	20.19	1.98	9.02	43.4508	0.340626	3	835.466	1	26.9267	3	237.914	3	164.527	1	0	1	0	1	0
135	1	2	64	0	2	1	0	1	1	2	0	0	16.1328	1	1	0	1233.85	67.5	59.18	2529.49	30.61	8.925	29.58	2.06	7.67	35.3053	0.339284	1	419.669	1	26.9267	1	60.432	2	82.5194	1	0	1	0	1	0
136	1	1	70	1	1	1	0	0	0	1	0	1	27.6839	0	0	0	4337.69	182.85	199.72	33837.5	327.47	125	123.17	5.88	30.15	51.562	0.339439	3	835.466	2	169.168	2	122.727	3	82.5194	1	0	1	0	2	7.9996
136	0	2	72	0	2	1	1	0	0	2	0	0	21.6312	0	0	0	2881.77	144.5	113.09	21502	236.51	125	50.17	5.86	24.39	45.3769	0.341412	2	637.314	1	26.9267	3	237.914	3	164.527	2	1.5	2	0.75	1	0
137	1	2	58	1	1	1	0	0	1	1	0	0	20.2583	0	0	0	1089.03	52.59	50.94	7527.14	107.36	133.925	34.3	1.53	9.16	44.7308	0.341052	3	835.466	3	337.411	3	237.914	3	164.527	2	1.5	3	5.25	1	0
137	0	1	54	1	1	1	0	0	0	1	0	1	24.8706	0	1	1	2062.75	100.6	106.38	7697.21	132.68	0	48.63	2.68	15.88	35.8218	0.341726	3	835.466	3	337.411	2	122.727	3	164.527	3	7	2	0.75	1	0
138	1	2	66	0	1	1	0	0	1	2	0	0	19.717	0	0	0	1609.24	45.53	53.3	8338.44	136.86	66.975	30.5	1.65	10.56	43.7549	0.341472	1	419.669	1	26.9267	3	237.914	3	164.527	1	0	1	0	1	0
138	0	2	68	0	2	1	1	1	0	2	0	0	18.7436	0	0	0	2015.43	81.94	85.45	8403.02	129.75	125	40.45	2.52	10.83	47.4064	0.342268	2	637.314	2	169.168	2	122.727	2	82.5194	2	1.5	2	0.75	1	0
139	1	2	71	0	2	1	0	1	1	2	0	1	25.5937	0	1	0	2665.19	110.3	69.84	17095	238.94	80.35	62.66	5.07	15.74	44.5917	0.341626	2	637.314	2	169.168	3	237.914	1	26.3893	3	7	2	0.75	2	7.9996
139	0	2	65	0	1	1	1	0	0	1	0	0	21.7322	0	0	0	1374.47	48.59	70.25	7467.65	80.59	125	19.51	1.01	7.39	33.8785	0.342511	1	419.669	1	26.9267	2	122.727	1	26.3893	2	1.5	2	0.75	1	0
140	1	2	69	0	2	0	0	0	0	2	0	1	32.4557	0	1	1	2233.77	97.21	82.8	10597.3	167.68	0	40.83	2.39	21.83	48.8658	0.341974	2	637.314	3	337.411	2	122.727	1	26.3893	1	0	1	0	2	7.9996
140	0	2	68	0	2	1	0	0	0	2	0	1	25.8746	0	0	0	2006.3	95.49	67.01	17349.5	236.48	125	45.7	3.47	15.25	46.0247	0.342682	3	835.466	1	26.9267	3	237.914	3	164.527	1	0	3	5.25	1	0
141	0	2	71	0	1	0	0	2	0	2	1	1	25.9698	0	0	0	2613.44	82.47	141.8	6899.53	110.82	125	73.92	2.83	12.84	53.3513	0.343976	1	419.669	1	26.9267	1	60.432	1	26.3893	2	1.5	2	0.75	1	0
141	1	2	69	0	1	0	0	1	1	1	0	1	27.7662	1	0	0	2198.28	118.85	108.34	11077.6	93.42	2.225	39.59	4.53	16.42	29.414	0.343586	1	419.669	1	26.9267	2	122.727	3	164.527	1	0	2	0.75	1	0
142	0	2	67	0	1	1	0	2	0	2	1	0	23.9574	0	0	0	1753.04	61.63	68.25	3451.22	125.31	35.725	34.78	2.53	10.08	48.307	0.344564	1	419.669	1	26.9267	2	122.727	3	164.527	2	1.5	2	0.75	1	0
142	1	2	69	1	1	0	0	0	0	2	0	0	23.7954	0	0	0	3342.63	151.68	128.12	11240.6	202.04	0	42.96	3.66	26.99	43.7954	0.344546	1	419.669	3	337.411	1	60.432	2	82.5194	2	1.5	3	5.25	2	7.9996
143	1	2	71	0	2	1	0	5	1	2	1	0	23.7954	1	0	0	2597.5	144.45	116.45	8356.86	143.77	66.975	38.54	2.75	22.47	48.1782	0.344701	2	637.314	3	337.411	1	60.432	2	82.5194	1	0	1	0	2	7.9996
143	0	1	56	1	2	1	0	10	0	2	1	0	23.7896	0	0	0	2411.56	93.57	106.04	13051.1	175.12	107.15	44.31	2.92	14.45	29.617	0.345132	2	637.314	2	169.168	2	122.727	3	164.527	2	1.5	3	5.25	1	0
144	0	1	62	0	2	1	0	1	0	2	0	0	21.5657	1	0	0	2505.84	103.08	103.53	4972.03	79.86	125	41.85	3.34	14.63	37.5572	0.345654	2	637.314	1	26.9267	1	60.432	2	82.5194	2	1.5	2	0.75	1	0
144	1	1	65	1	2	1	1	3	0	2	1	1	27.0157	0	0	0	4308.54	175.39	163.33	12778.8	175.65	125	73.86	5.77	25.65	55.1932	0.34558	2	637.314	2	169.168	1	60.432	3	164.527	3	7	2	0.75	2	7.9996
145	1	1	54	1	2	1	0	0	0	2	0	0	22.8434	0	0	1	1977.16	65.09	108.18	7238.99	83.35	250	28.94	1.11	11.25	21.7082	0.345618	1	419.669	1	26.9267	2	122.727	1	26.3893	2	1.5	1	0	1	0
145	0	1	64	0	2	1	0	1	0	2	0	1	24.9469	0	0	0	2926.58	160.41	97.53	15099	165.33	214.275	52.22	4.26	27.42	52.6146	0.345791	3	835.466	3	337.411	2	122.727	3	164.527	2	1.5	3	5.25	2	7.9996
146	0	2	69	0	1	1	0	0	0	2	0	0	21.1328	0	0	0	2119.43	94.57	70.56	15189.8	141.84	375	30.75	2.45	14.44	40.4027	0.347179	2	637.314	2	169.168	2	122.727	2	82.5194	3	7	3	5.25	1	0
146	1	1	54	1	1	0	0	1	0	2	0	0	21.8359	0	0	0	1973.79	46.14	114.63	9607.76	112.81	53.5715	61.91	1.55	8.8	36.8658	0.345771	1	419.669	1	26.9267	2	122.727	2	82.5194	1	0	2	0.75	1	0
147	0	2	67	0	2	1	0	1	0	2	0	1	24.0766	0	0	0	1682.54	75.91	73.48	7843.72	100.76	125	38.2	2.47	12.61	52.7726	0.34778	3	835.466	2	169.168	2	122.727	3	164.527	2	1.5	3	5.25	1	0
147	1	2	71	0	1	0	0	0	0	1	0	1	29.2571	0	0	0	2559.31	87.11	96.45	12599.3	88.15	66.975	44.76	2.48	13.56	36.772	0.346442	1	419.669	2	169.168	1	60.432	2	82.5194	2	1.5	2	0.75	2	7.9996
148	1	1	58	1	2	0	0	2	0	2	1	0	20.5457	1	0	0	2803.42	121.84	106.97	12620.4	152.3	125	54.83	4.15	17.68	44.7869	0.346585	3	835.466	2	169.168	1	60.432	2	82.5194	3	7	1	0	1	0
148	0	1	60	0	2	1	0	0	0	2	0	0	23.4142	0	0	0	2018.69	70.95	108.33	5886.41	35.75	125	23.28	2.5	10.48	22.7171	0.348551	1	419.669	2	169.168	1	60.432	1	26.3893	2	1.5	3	5.25	1	0
149	0	1	60	0	2	1	0	4	0	2	1	1	24.2043	0	0	1	1979.59	92.01	80.86	4313.58	112.64	125	59.95	3.21	13.77	53.2264	0.350343	3	835.466	3	337.411	1	60.432	3	164.527	3	7	2	0.75	1	0
149	1	2	67	2	2	0	0	0	0	1	0	0	18.4207	0	0	0	1693.33	107.44	70.78	43440.2	139.86	35.725	57.32	2.28	18.06	35.9948	0.347287	2	637.314	2	169.168	3	237.914	1	26.3893	1	0	2	0.75	2	7.9996
150	1	2	64	0	1	1	0	0	1	1	0	0	15.2728	0	0	1	1023.85	36.37	57.82	5634.56	59.97	89.275	33.71	0.89	6.37	31.8706	0.348837	1	419.669	1	26.9267	2	122.727	2	82.5194	2	1.5	1	0	1	0
150	0	2	66	0	2	1	0	2	0	2	1	1	24.7656	0	0	0	1407.63	50.63	50.98	4546.38	78.13	71.425	27.48	1.82	7.91	37.9186	0.350668	2	637.314	2	169.168	2	122.727	2	82.5194	2	1.5	2	0.75	1	0
151	1	2	70	0	2	1	1	2	0	2	1	0	22.7444	0	0	0	2276.69	74.21	139.1	4186.92	60.62	125	50.3	2.18	11.9	32.5628	0.349678	1	419.669	2	169.168	1	60.432	1	26.3893	2	1.5	2	0.75	1	0
151	0	2	65	0	2	1	1	4	0	2	1	1	26.2148	0	0	0	1190.68	53.03	55.65	6157.58	74.12	35.715	28.57	1.71	8.49	23.8425	0.350902	2	637.314	2	169.168	2	122.727	2	82.5194	2	1.5	2	0.75	2	7.9996
152	0	2	65	0	2	1	1	0	0	2	0	0	23.2254	0	0	0	1186.88	51.46	46.66	7581.48	106.56	102.677	29.45	1.66	11.05	33.6845	0.351076	3	835.466	3	337.411	3	237.914	3	164.527	2	1.5	2	0.75	2	7.9996
152	1	1	55	1	2	1	0	2	0	1	1	1	25.3515	0	0	0	2086.34	68.88	91.83	5815.71	68.36	35.725	52.46	1.88	12.07	36.5643	0.350314	1	419.669	1	26.9267	1	60.432	1	26.3893	2	1.5	2	0.75	1	0
153	0	1	62	0	2	1	0	3	0	2	1	0	18.7429	0	1	1	2383.24	87.56	103.88	10684.4	134.09	125	50.81	1.92	13.82	43.3132	0.351264	2	637.314	3	337.411	2	122.727	2	82.5194	3	7	3	5.25	1	0
153	1	2	67	0	1	1	0	5	0	1	1	0	19.4531	1	0	0	1620.47	67.74	89.35	23164.1	130.23	0	31.01	1.18	6.46	33.486	0.350624	1	419.669	1	26.9267	3	237.914	2	82.5194	1	0	1	0	1	0
154	1	1	66	1	2	0	0	4	0	2	1	0	21.7738	1	0	0	3227.66	110.93	91.48	16687.5	326.83	53.575	54.32	3.69	18.57	47.698	0.351405	1	419.669	2	169.168	2	122.727	2	82.5194	1	0	1	0	2	7.9996
154	0	1	60	1	2	1	0	1	0	2	0	0	23.1078	1	0	0	3124.6	149.5	108.88	14025	157.23	125	79.21	4.11	18.62	33.9517	0.351281	3	835.466	1	26.9267	2	122.727	3	164.527	2	1.5	2	0.75	1	0
155	1	1	64	1	1	1	0	0.5	0	1	0	1	26.5731	0	0	1	2720.39	64.56	175.45	4264.07	89.9	0	102.43	1.99	12.94	48.5787	0.355252	1	419.669	2	169.168	1	60.432	2	82.5194	3	7	2	0.75	1	0
155	0	1	63	1	2	1	1	2	0	2	1	0	21.2457	0	0	0	2498.2	78.54	98.7	11662.1	144.04	125	57.88	2.45	12.81	48.895	0.355728	1	419.669	2	169.168	2	122.727	3	82.5194	2	1.5	2	0.75	1	0
156	1	1	59	0	1	1	0	0	1	1	0	1	25.8682	0	0	0	1619.52	89.87	60.29	15094.3	140.57	125	42.09	2.3	13.71	40.2066	0.357172	3	835.466	3	337.411	3	237.914	2	82.5194	3	7	3	5.25	1	0
156	0	1	64	0	2	1	0	0	0	2	0	1	24.2639	0	0	0	2692.91	105.58	85.15	4206.99	122.33	89.275	55.4	3.03	20.44	41.7801	0.356521	2	637.314	3	337.411	1	60.432	2	82.5194	2	1.5	2	0.75	2	7.9996
157	0	1	59	0	1	1	0	2	0	2	1	1	26.2857	0	0	0	1582.92	38.45	105.36	2239.49	69.46	35.725	42.57	1.1	8.14	25.0781	0.358867	1	419.669	1	26.9267	1	60.432	1	26.3893	1	0	2	0.75	1	0
157	1	2	68	0	2	1	0	2	1	2	1	1	25.036	0	1	0	1671.57	71.52	85.75	7830.39	96.6	35.725	28.91	1.28	15.65	29.6173	0.358037	3	835.466	3	337.411	2	122.727	1	26.3893	1	0	3	5.25	2	7.9996
158	1	2	60	1	1	1	0	0	0	2	0	0	20.058	1	0	0	1133.25	38.25	81.67	12379.4	95.78	53.575	32.33	1.16	6.69	31.148	0.358447	2	637.314	1	26.9267	3	237.914	2	82.5194	1	0	2	0.75	1	0
158	0	1	56	0	1	1	0	0	0	2	0	1	25.4979	0	0	1	939.21	22.4	56.42	4039.34	42.59	71.425	25.02	0.64	4.5	26.3946	0.359243	1	419.669	3	337.411	1	60.432	1	26.3893	2	1.5	1	0	1	0
159	1	1	64	1	1	1	1	4	0	1	1	1	27.9881	0	0	1	2647.79	44.76	183.72	6323.71	74.75	35.7142	98.59	1.14	9.93	30.0857	0.358611	1	419.669	2	169.168	1	60.432	1	26.3893	3	7	1	0	1	0
159	0	2	72	0	2	1	0	2	0	2	1	1	25.0658	0	1	0	2480.51	87.02	134.2	10636.4	144.28	125	58.57	2.52	14.56	54.668	0.359824	3	835.466	3	337.411	2	122.727	2	82.5194	3	7	3	5.25	2	7.9996
160	0	2	71	0	2	0	0	2	0	2	1	1	25.677	0	0	0	2260.42	83.43	128.49	7159.32	51.81	125	59.07	2.81	11.99	31.3177	0.360206	3	835.466	3	337.411	1	60.432	2	82.5194	3	7	3	5.25	1	0
160	1	2	73	0	2	0	0	0	0	2	0	0	17.4174	1	0	0	2716.37	122.06	159.65	436.11	78.46	125	1186.59	4841.9	19.44	36.6491	0.358711	2	637.314	2	169.168	1	60.432	2	82.5194	2	1.5	2	0.75	2	7.9996
161	0	1	65	1	2	1	0	2	0	2	1	0	21.2878	0	0	0	2797.34	110.93	136.23	17497.7	176.08	125	43.78	2.6	20.3	24.9489	0.361505	2	637.314	3	337.411	2	122.727	2	82.5194	3	7	3	5.25	1	0
161	1	1	65	0	1	1	0	0	0	2	0	0	18.7543	0	0	1	2826.2	81.44	89.77	300.08	8.98	250	26.39	1.44	14.94	19.3756	0.360163	1	419.669	1	26.9267	1	60.432	1	26.3893	2	1.5	2	0.75	1	0
162	0	1	60	1	1	1	0	2	0	2	1	0	22.4197	1	0	0	1722.17	44.79	48.72	4800.99	64.35	17.85	27.26	1.37	8.1	25.9828	0.362242	1	419.669	1	26.9267	1	60.432	1	26.3893	1	0	2	0.75	1	0
162	1	2	71	0	1	1	1	2	1	2	1	0	23.833	0	0	0	2245.19	112.62	76.64	3314.86	68.31	26.775	43.92	2.74	19.04	33.7564	0.360914	1	419.669	1	26.9267	1	60.432	2	82.5194	1	0	1	0	1	0
163	1	2	66	0	1	0	0	7	0	1	1	1	31.0513	0	0	0	1162.75	29.5	58.8	4414.5	74.37	17.8573	27.9	0.85	5.54	27.8679	0.361989	1	419.669	1	26.9267	2	122.727	1	26.3893	2	1.5	2	0.75	1	0
163	0	2	67	0	2	1	1	1	0	2	0	0	19.2526	0	0	0	1354.2	53.15	52.91	5282.09	86.86	125	24.58	1.48	8.24	36.0059	0.36294	2	637.314	3	337.411	1	60.432	1	26.3893	3	7	3	5.25	1	0
164	1	2	67	0	1	1	0	0	0	1	0	1	25.6146	0	0	0	1368.57	36.11	50.52	1622.16	40.3	35.725	25.4	0.74	5.92	29.9046	0.36227	1	419.669	1	26.9267	1	60.432	1	26.3893	1	0	1	0	1	0
164	0	1	63	1	1	1	0	0	0	2	0	1	27.0299	0	1	1	2333.31	84.76	112.2	23919.4	176.34	89.275	46.64	2.28	14.13	43.6647	0.363382	3	835.466	2	169.168	3	237.914	1	26.3893	3	7	1	0	1	0
165	0	2	67	0	2	1	0	1	0	2	0	0	20.3125	0	0	0	1343.9	63.94	55.64	5184.89	124.52	53.575	38.64	2.28	10.67	40.5529	0.36342	3	835.466	3	337.411	3	237.914	3	164.527	2	1.5	2	0.75	2	7.9996
165	1	2	68	0	2	1	1	2	0	1	1	1	24.5994	0	0	1	1568.41	57.95	79.31	5175.86	40.95	125	29.63	1.52	8.59	27.0493	0.36283	1	419.669	3	337.411	1	60.432	1	26.3893	2	1.5	3	5.25	1	0
166	0	1	58	0	2	1	0	0	0	1	0	0	23.5262	0	0	1	1262.95	54.31	35.88	12028.1	105.07	26.775	20.4	1.74	8.18	33.5316	0.363896	3	835.466	2	169.168	3	237.914	3	164.527	2	1.5	1	0	1	0
166	1	1	57	1	1	0	1	5	1	1	1	0	20.2734	0	0	0	2218.64	53.9	85.48	2052.99	24.16	35.7142	40.11	1.13	9.28	27.2477	0.363798	1	419.669	2	169.168	1	60.432	1	26.3893	2	1.5	2	0.75	1	0
167	0	1	55	1	2	1	0	2	0	2	1	1	29.0659	1	0	0	1772.34	59	40.02	10404	159.2	89.275	30.99	2.01	11.18	46.2748	0.364851	2	637.314	2	169.168	2	122.727	2	82.5194	1	0	3	5.25	1	0
167	1	1	62	1	2	1	0	1.5	0	2	0	0	19.5918	1	0	1	2093.69	106.77	100.38	23103.1	329.83	7.15	41.78	2.44	12.77	43.8256	0.364677	2	637.314	1	26.9267	3	237.914	2	82.5194	2	1.5	2	0.75	2	7.9996
168	0	2	63	1	2	1	0	1	0	2	0	1	28.3112	0	0	0	1601.34	67.91	81.01	10400.8	128.98	0	46.94	2.02	9.05	23.5453	0.366248	3	835.466	1	26.9267	3	237.914	3	164.527	1	0	3	5.25	1	0
168	1	2	76	0	2	1	0	1	1	1	0	1	28.0685	1	0	1	3189.27	158.64	96.56	29132.5	426	66.975	51.48	4.02	20.44	52.459	0.366289	1	419.669	1	26.9267	3	237.914	1	26.3893	1	0	1	0	2	7.9996
169	1	1	68	1	2	1	0	1	0	2	0	0	22.4633	0	0	0	3258.52	119.24	113.08	7716.29	137.44	35.725	48.88	3.5	23.46	40.6159	0.369659	1	419.669	3	337.411	1	60.432	1	26.3893	2	1.5	2	0.75	2	7.9996
169	0	2	70	0	1	1	0	0	0	2	0	1	24.8438	0	0	1	1850.66	69.04	69.94	8194.35	88.63	125	26.99	1.85	10.51	42.9983	0.369449	3	835.466	3	337.411	2	122.727	1	26.3893	3	7	3	5.25	1	0
170	1	1	73	0	1	1	1	4	0	1	1	1	24.6389	0	0	1	4314.35	235.01	137.18	34696.3	286.38	125	106.46	7.63	34.66	56.5449	0.369823	2	637.314	2	169.168	2	122.727	2	82.5194	3	7	1	0	1	0
170	0	2	75	0	1	0	1	1	0	1	0	0	19.7137	0	1	1	2882.97	91.82	145.52	11957.2	161.79	107.15	68.98	2.89	16.6	54.9428	0.370719	2	637.314	2	169.168	2	122.727	1	26.3893	3	7	2	0.75	1	0
171	0	1	60	1	2	1	0	2	0	2	1	1	26.1015	0	0	1	2670.62	84.68	91.94	3938.53	127.84	125	42.88	2.51	17.77	54.9233	0.372407	2	637.314	3	337.411	1	60.432	1	26.3893	3	7	3	5.25	2	7.9996
171	1	1	61	1	1	0	0	5	1	2	1	0	23.845	0	0	1	1752.72	50.2	89.45	8184.7	79.8	35.7142	43.04	1.29	9.61	38.2239	0.370727	2	637.314	3	337.411	2	122.727	2	82.5194	3	7	1	0	1	0
172	1	1	63	1	1	1	0	0	0	1	0	0	19.0828	0	0	1	2167.17	115.68	86.2	23856.3	141.53	35.725	43.05	4.15	19.01	36.9562	0.371164	3	835.466	3	337.411	3	237.914	3	164.527	3	7	1	0	1	0
172	0	1	63	1	2	1	0	1	0	2	0	0	20.3177	0	0	0	3293.99	147.04	146	19072.2	273.42	35.725	81.37	5.62	23.81	61.2147	0.372983	3	835.466	2	169.168	3	237.914	3	164.527	1	0	2	0.75	2	7.9996
173	1	2	70	0	1	1	0	1	0	1	0	0	23.1166	1	0	0	1799.47	88.65	81.15	9224.11	79.42	4.475	46.05	2.34	10.85	36.8645	0.371856	2	637.314	1	26.9267	1	60.432	3	164.527	1	0	2	0.75	1	0
173	0	2	76	0	1	1	1	3	0	2	1	1	24.0166	0	1	0	3032.73	114.05	80.56	10482.3	226.27	125	38.21	2.96	22.58	55.3642	0.373644	2	637.314	3	337.411	2	122.727	2	82.5194	2	1.5	3	5.25	2	7.9996
174	0	1	62	0	2	1	0	0	0	1	0	0	22.4383	1	0	0	1888.9	62.66	36.74	22207.8	119.02	0	22.99	1.9	11.18	35.6833	0.374293	1	419.669	1	26.9267	3	237.914	1	26.3893	1	0	1	0	1	0
174	1	1	55	1	1	0	0	8	0	1	1	1	26.4706	0	0	0	1622.59	48.05	64.53	2942.17	45.84	71.425	28.18	1.01	7.41	32.4485	0.371874	1	419.669	1	26.9267	1	60.432	1	26.3893	1	0	1	0	1	0
175	0	2	67	0	2	0	0	4	1	2	1	0	22.1591	0	0	0	1104.59	20.49	44.33	177.4	0	0	23.49	0.65	5.17	33.2648	0.374651	1	419.669	1	26.9267	1	60.432	1	26.3893	1	0	1	0	1	0
175	1	2	72	0	1	1	0	0	0	2	0	0	20.2395	0	1	1	2218.94	75.24	76.14	40776.7	525.03	125	41.27	2.72	13.67	39.886	0.372057	3	835.466	3	337.411	3	237.914	1	26.3893	3	7	3	5.25	1	0
176	1	1	64	1	2	0	0	0	0	2	0	1	26.0417	1	1	0	2356.55	102.7	69.86	24435.3	247.35	0	45.65	3.26	21.27	52.4847	0.372222	3	835.466	3	337.411	3	237.914	1	26.3893	2	1.5	3	5.25	2	7.9996
176	0	1	54	1	2	1	1	1	0	2	0	0	16.4233	1	0	0	1337.66	38.46	50.31	2832.01	15.28	35.725	16.69	0.92	6.44	18.9304	0.375321	1	419.669	1	26.9267	1	60.432	1	26.3893	2	1.5	2	0.75	1	0
177	1	2	72	0	1	1	1	0	0	1	0	1	24.3261	0	0	0	2201.76	89.52	96.88	12875.8	171.84	125	62.02	2.99	13.1	42.3432	0.372866	3	835.466	2	169.168	2	122.727	3	82.5194	3	7	1	0	1	0
177	0	2	66	0	2	1	1	3	0	2	1	0	20.9902	0	0	0	864.16	17.6	47.53	181.72	0	125	24.64	0.35	3.39	30.2159	0.376001	1	419.669	1	26.9267	1	60.432	1	26.3893	1	0	1	0	1	0
178	1	2	72	0	1	1	0	0	0	1	0	1	29.0815	0	0	0	2198.28	118.85	108.34	11077.6	93.42	2.225	39.59	4.53	16.42	29.414	0.37303	1	419.669	1	26.9267	2	122.727	3	164.527	1	0	2	0.75	1	0
178	0	2	76	0	1	1	0	2.5	1	1	1	0	23.2748	0	0	0	2971.99	117.28	144.44	11101.8	180.75	160.725	65.45	3.44	15.87	55.4576	0.376514	2	637.314	2	169.168	3	237.914	3	164.527	3	7	1	0	1	0
179	0	1	60	1	2	1	0	11	0	2	1	0	21.9525	0	0	0	1414.08	36.96	55.88	3165.6	26.1	142.85	26.79	0.97	7.23	34.1277	0.376707	1	419.669	1	26.9267	1	60.432	1	26.3893	1	0	1	0	1	0
179	1	1	58	1	2	1	0	0.5	0	2	0	1	26.2976	0	0	0	992.89	21.78	42.43	4651.24	49.01	0	24.56	0.7	4.72	32.6849	0.376587	1	419.669	1	26.9267	2	122.727	2	82.5194	1	0	1	0	1	0
180	1	1	58	1	1	1	0	1	0	2	0	0	21.7505	0	0	0	2131.22	69.54	92.62	3000.91	111.86	53.575	30.55	1.93	11.55	32.1188	0.377872	1	419.669	1	26.9267	1	60.432	1	26.3893	2	1.5	2	0.75	1	0
180	0	1	58	1	2	1	0	0	0	2	0	0	19.5848	0	0	0	2139.48	59.64	144.02	5559.06	76.5	89.275	71.22	2.11	10.8	37.9738	0.37748	1	419.669	1	26.9267	1	60.432	2	82.5194	2	1.5	1	0	1	0
181	0	1	60	0	1	1	0	0	0	1	0	0	23.8287	0	0	0	1374.09	52.79	46.54	8937.51	113.64	71.425	33.98	1.98	7.63	38.8486	0.378602	2	637.314	1	26.9267	3	237.914	3	82.5194	2	1.5	2	0.75	1	0
181	1	2	75	0	1	1	0	4	1	1	1	1	25.6146	0	1	1	2716.37	122.06	159.65	7934.64	88.39	125	47.55	3.54	19.44	36.6491	0.378586	2	637.314	2	169.168	1	60.432	2	82.5194	2	1.5	2	0.75	2	7.9996
182	0	1	64	1	1	1	0	0	0	2	0	1	27.4395	0	0	0	3374.28	122.52	128.52	15793.6	209.48	125	71.89	4.31	20.54	55.3599	0.379206	1	419.669	1	26.9267	2	122.727	2	82.5194	2	1.5	2	0.75	2	7.9996
182	1	1	73	0	2	0	1	0	0	2	0	0	21.7622	0	1	1	4121.72	202.48	199.29	32976.7	397.97	71.425	106.47	6.28	31.34	54.2534	0.378917	3	835.466	2	169.168	3	237.914	3	82.5194	3	7	3	5.25	1	0
183	1	1	62	1	2	1	0	2	0	2	1	1	25.8132	1	0	0	1772.05	35.49	98.36	608.8	15.94	13.4	52.9	0.96	7.11	33.8094	0.379825	1	419.669	1	26.9267	1	60.432	1	26.3893	2	1.5	1	0	1	0
183	0	1	62	1	2	1	0	1	1	2	0	1	25.1547	1	0	0	2930.16	130.06	96.49	20763.8	390.41	0	27.16	2.94	24.12	24.465	0.380174	2	637.314	2	169.168	3	237.914	1	26.3893	2	1.5	1	0	2	7.9996
184	1	1	62	0	2	1	0	0	0	2	0	1	27.4779	0	0	1	1753.84	75.63	68.86	6220.12	77.3	125	48.14	2.04	12.9	41.0266	0.38069	1	419.669	1	26.9267	2	122.727	2	82.5194	1	0	2	0.75	1	0
184	0	1	69	0	2	1	1	0	0	2	0	1	26.1896	1	0	0	3241.83	134.29	158.21	18508.4	263.77	125	65.9	4.44	21.63	58.7831	0.380456	2	637.314	2	169.168	3	237.914	3	164.527	3	7	3	5.25	1	0
185	1	1	64	0	2	0	0	0	0	1	0	1	25.5648	0	0	0	2171.53	86.3	99.66	9051.34	145.71	53.575	50.1	2.88	13.45	52.2916	0.380977	3	835.466	3	337.411	2	122.727	2	82.5194	3	7	2	0.75	2	7.9996
185	0	2	71	0	2	1	1	2	1	2	1	1	25.9766	0	1	0	1819.43	55.94	71.01	18140.4	275.03	53.575	34.94	1.78	10.57	46.5621	0.380935	2	637.314	2	169.168	3	237.914	1	26.3893	1	0	3	5.25	1	0
186	1	2	74	0	1	1	1	2	0	1	1	1	32.4609	0	0	0	2451.95	48.5	152.64	2943.84	24.54	71.425	65.9	1.65	10.17	44.4492	0.381081	1	419.669	1	26.9267	1	60.432	1	26.3893	1	0	2	0.75	1	0
186	0	1	61	0	2	1	0	0.5	0	2	0	1	27.0014	0	0	0	1518.78	73.39	71.21	7653.88	123.36	125	41.53	2.17	10.14	35.2053	0.381793	3	835.466	3	337.411	2	122.727	2	82.5194	3	7	3	5.25	1	0
187	1	1	73	0	2	1	0	0	0	2	0	1	26.4463	0	0	0	4029.25	143.89	132.73	48957	259.92	0	77.58	5.88	25.54	47.8648	0.383313	2	637.314	2	169.168	2	122.727	2	82.5194	1	0	2	0.75	2	7.9996
187	0	1	62	0	1	0	0	0	0	1	0	1	26.955	0	1	0	1702.36	44.39	60.96	4179.13	40.56	0	26.52	0.93	8.32	25.2327	0.383139	1	419.669	3	337.411	1	60.432	1	26.3893	3	7	1	0	1	0
188	0	1	53	1	2	1	0	1	0	2	0	1	26.8726	0	0	0	953.45	25.9	35.34	2009.05	20.54	22.325	22.57	0.7	4.88	25.3207	0.3835	1	419.669	1	26.9267	1	60.432	2	82.5194	1	0	1	0	1	0
188	1	1	59	0	1	1	1	0	0	1	0	0	16.7406	0	0	0	1056.1	25.14	52.19	7001.05	55.34	0	26.55	1.04	6.42	42.2546	0.383647	1	419.669	1	26.9267	2	122.727	1	26.3893	1	0	1	0	1	0
189	1	1	62	0	2	0	0	4	0	2	1	0	19.5918	0	0	0	1676.97	64.19	73.53	10719.9	197.55	125	40.72	1.85	9.7	40.5921	0.38435	2	637.314	2	169.168	3	237.914	2	82.5194	2	1.5	1	0	1	0
189	0	2	73	0	2	1	1	0	0	2	0	1	24.8057	0	0	0	2171.53	86.3	99.66	9051.34	145.71	53.575	50.1	2.88	13.45	52.7678	0.384346	3	835.466	3	337.411	2	122.727	2	82.5194	3	7	2	0.75	2	7.9996
190	0	1	59	0	2	1	0	0	0	1	0	1	24.8725	0	0	0	1023	68.77	49.03	9851.31	176.28	0	40.67	1.87	9.17	46.6406	0.385226	3	835.466	3	337.411	3	237.914	3	164.527	3	7	1	0	1	0
190	1	1	64	0	2	0	0	0	0	2	0	1	25.7633	1	0	0	2096.48	73.45	105.83	3765.83	73.05	187.5	38.59	2.04	10.54	20.9702	0.384551	2	637.314	3	337.411	1	60.432	2	82.5194	3	7	2	0.75	1	0
191	0	1	62	0	2	1	0	0	0	2	0	1	27.6787	0	0	0	1609.65	62.98	69.28	9028.09	103.49	125	28.79	1.53	11.7	36.9062	0.387566	3	835.466	3	337.411	2	122.727	2	82.5194	3	7	1	0	2	7.9996
191	1	1	68	1	1	1	1	2	1	2	1	0	18.6505	0	0	1	2883.17	80.72	153.74	13149.2	96.3	53.575	75.87	2.02	13.57	41.4401	0.387455	1	419.669	2	169.168	2	122.727	2	82.5194	3	7	1	0	1	0
192	0	1	57	1	2	0	0	0	1	2	0	0	19.4464	0	0	0	1666.62	52.26	69.46	2323.05	35.98	35.725	28.05	1.07	7.41	18.2066	0.38992	1	419.669	1	26.9267	1	60.432	1	26.3893	2	1.5	1	0	1	0
192	1	2	70	0	2	1	1	0	0	2	0	0	19.6183	0	0	0	1428.34	59.25	74.31	3726.65	82.38	250	38.77	1.36	9.13	40.3954	0.38949	3	835.466	2	169.168	3	237.914	3	164.527	1	0	3	5.25	1	0
193	0	1	63	1	2	1	0	3	1	2	1	1	25.2501	0	0	0	2918.87	124.63	91.44	16618.2	336.3	125	72.88	4.91	20.39	48.7827	0.390829	3	835.466	3	337.411	3	237.914	3	164.527	3	7	3	5.25	1	0
193	1	2	75	0	1	1	0	0	0	1	0	1	29.4222	0	0	0	2455.36	111.27	105.09	13875.4	192.34	71.425	65.08	3.57	15.45	41.3428	0.39104	3	835.466	2	169.168	2	122.727	3	164.527	2	1.5	3	5.25	1	0
194	1	1	61	0	2	1	0	1	1	2	0	1	26.1593	0	0	1	1319.72	35.01	51	3485.96	35.79	53.575	23.89	0.63	6.34	27.2977	0.391307	1	419.669	1	26.9267	2	122.727	1	26.3893	1	0	1	0	1	0
194	0	2	75	0	2	1	0	0	0	2	0	0	23.7871	0	0	1	2424.7	101.52	126.15	7505.35	90.25	107.15	64.89	4.07	13.45	36.5307	0.392513	2	637.314	2	169.168	1	60.432	2	82.5194	3	7	1	0	1	0
195	0	1	60	0	2	1	0	0	0	1	0	0	20.5855	0	0	0	1082.29	37.12	49.41	6023.67	132.03	89.275	21.75	1.04	6.2	33.515	0.392535	2	637.314	1	26.9267	3	237.914	1	26.3893	2	1.5	2	0.75	1	0
195	1	2	74	0	2	0	0	0	0	1	0	0	18.666	0	0	0	2236.34	58.84	152.84	6933.64	91.75	3.575	32.29	2.24	11.05	39.193	0.391383	1	419.669	2	169.168	2	122.727	1	26.3893	1	0	3	5.25	1	0
196	0	1	61	1	1	1	0	0	0	2	0	1	24.1868	0	0	0	2451.99	85.92	98.43	14259.4	114.51	71.425	39.25	2.28	17.44	16.0191	0.392902	1	419.669	3	337.411	1	60.432	1	26.3893	2	1.5	2	0.75	2	7.9996
196	1	1	64	1	2	1	0	3	0	2	1	0	23.7387	1	1	1	1951.13	99.09	93.85	5099.21	40.94	0	30.23	1.69	11.21	44.947	0.391508	1	419.669	1	26.9267	1	60.432	1	26.3893	1	0	1	0	1	0
197	1	1	64	0	1	1	0	0	1	1	0	1	27.2509	0	0	0	1869.74	78.81	103.99	27914.7	228.16	125	50.72	2.08	11.38	33.9976	0.395423	2	637.314	1	26.9267	3	237.914	3	164.527	1	0	1	0	1	0
197	0	2	80	0	1	1	0	1	0	2	0	0	19.1075	0	1	0	3427.69	144.64	140.75	15119.9	174.25	125	57.67	4.96	21.57	55.1924	0.395224	2	637.314	2	169.168	2	122.727	3	82.5194	1	0	3	5.25	1	0
198	1	1	61	1	1	1	0	2	0	1	1	1	27.3702	0	0	0	2396.6	38.13	155.76	696.39	26.4	8.925	81.95	0.99	7.51	26.1827	0.395568	1	419.669	1	26.9267	1	60.432	1	26.3893	1	0	1	0	1	0
198	0	2	72	0	2	1	1	1	0	2	0	1	27.6097	1	0	0	1714.66	59.92	102.56	17149.7	181.41	250	52.67	1.89	10.01	50.3337	0.396096	2	637.314	1	26.9267	3	237.914	1	26.3893	2	1.5	2	0.75	1	0
199	1	2	71	0	1	1	0	0	0	1	0	1	24.6186	0	0	0	1501	56.03	58.17	9025.15	63.29	53.575	43.82	1.52	9.48	34.4311	0.396182	1	419.669	1	26.9267	2	122.727	2	82.5194	2	1.5	1	0	1	0
199	0	2	74	0	2	1	0	0	0	2	0	0	20.1348	1	0	0	2123.15	110.35	108.99	17605.6	125.06	107.15	45.22	3.13	13.97	50.6883	0.396831	1	419.669	1	26.9267	2	122.727	3	164.527	1	0	1	0	1	0
200	0	1	61	1	1	1	0	0	0	2	0	0	23.218	0	0	0	2358.27	68.49	54.46	5493.95	60.87	125	33.61	1.89	10.47	27.0382	0.397416	1	419.669	1	26.9267	1	60.432	1	26.3893	1	0	1	0	1	0
200	1	1	64	1	2	1	0	0	1	2	0	0	22.2158	1	0	1	2988.72	160.46	119.06	9317.07	136.97	250	59.82	4.7	20.7	54.2967	0.397665	3	835.466	2	169.168	2	122.727	2	82.5194	3	7	2	0.75	1	0
201	0	1	59	1	2	1	0	2	0	2	1	1	24.2436	0	0	0	1915.26	92.98	85.69	13006.7	161.25	125	48.31	3.17	14.93	45.1986	0.398347	3	835.466	2	169.168	2	122.727	3	164.527	2	1.5	2	0.75	1	0
201	1	2	76	0	1	1	0	0.5	0	2	0	0	20.7422	0	0	0	2517.91	135.99	114.09	17309.6	208.76	53.575	99.7	3.62	16.64	33.6576	0.39823	3	835.466	2	169.168	3	237.914	2	82.5194	3	7	1	0	1	0
202	0	1	62	1	1	1	0	5	0	2	1	0	22.5013	0	0	0	2522.38	106.6	67.89	12502.8	157.41	71.425	40.6	3.57	16.03	42.7881	0.399724	2	637.314	2	169.168	2	122.727	3	164.527	2	1.5	2	0.75	1	0
202	1	1	72	0	2	0	0	0	0	2	0	1	30.6706	0	1	0	3502.05	125.11	137.96	18005.1	281.75	142.85	62.56	5.75	22.83	49.9901	0.398445	2	637.314	2	169.168	3	237.914	2	82.5194	3	7	1	0	2	7.9996
203	1	1	61	1	2	1	0	2	0	2	1	1	24.8443	0	0	0	2335.96	71.81	107.11	7353.59	163.62	71.4285	56.52	2.21	12.58	48.6479	0.398494	2	637.314	2	169.168	2	122.727	2	82.5194	3	7	1	0	1	0
203	0	1	63	1	1	1	0	0	1	2	0	1	24.6857	0	1	0	2713.12	80.29	77.99	5446.33	85.09	35.725	33.91	2.73	14.58	39.9847	0.400746	1	419.669	2	169.168	1	60.432	1	26.3893	2	1.5	3	5.25	1	0
204	1	2	74	0	2	1	0	0	0	2	0	0	18.8189	1	0	0	2079	87.47	91.23	22903.2	220.72	0	61.13	3.53	12.82	29.7479	0.398963	2	637.314	1	26.9267	3	237.914	3	164.527	1	0	1	0	1	0
204	0	2	65	1	1	1	1	3	0	2	1	0	20.4224	0	0	0	1288.07	50.1	59.63	7916.4	166.92	125	38.18	1.69	8.21	36.6255	0.401362	2	637.314	1	26.9267	3	237.914	2	82.5194	1	0	2	0.75	1	0
205	1	2	74	0	2	1	0	3	0	2	1	1	25.5078	0	0	0	2055.78	73.93	78.97	7461.86	83.94	125	50.15	1.99	12.17	34.1258	0.400086	3	835.466	3	337.411	2	122.727	2	82.5194	3	7	2	0.75	1	0
205	0	1	75	0	2	1	1	1	0	2	0	0	18.4775	0	0	0	4073.65	142.44	202.54	15067.7	217.73	142.5	51.5	3.76	19.99	38.7516	0.401541	2	637.314	2	169.168	2	122.727	2	82.5194	3	7	1	0	1	0
206	0	2	75	0	1	1	0	2	1	2	1	0	22.913	0	0	0	2233.03	85.92	86.72	11029	156.29	125	48.23	2.64	13.61	34.302	0.401762	3	835.466	3	337.411	3	237.914	2	82.5194	3	7	3	5.25	1	0
206	1	1	66	0	1	1	0	1	0	2	0	0	18.3737	0	0	0	2189.83	100.64	74.14	11864.2	104.72	125	46.85	3.7	16.02	42.7776	0.400428	2	637.314	3	337.411	2	122.727	3	164.527	3	7	1	0	1	0
207	0	1	60	1	1	1	0	0	0	2	0	0	19.7551	0	0	0	2019.95	76.48	75.48	14061.3	156.27	125	53.93	2.27	11.23	43.7293	0.403536	2	637.314	2	169.168	3	237.914	2	82.5194	2	1.5	2	0.75	1	0
207	1	2	73	1	2	1	0	2	0	2	1	0	18.6812	1	0	0	2999.69	124.05	120.96	13136.3	237.23	125	68.96	5.4	18.56	45.822	0.400555	3	835.466	2	169.168	1	60.432	2	82.5194	3	7	1	0	1	0
208	1	1	63	1	1	0	0	1	0	2	0	0	23.4924	0	0	0	1503.5	47.22	76.13	2787.99	36.07	71.425	35.33	0.93	7.6	33.8138	0.402886	1	419.669	1	26.9267	1	60.432	2	82.5194	1	0	1	0	1	0
208	0	1	64	0	2	1	0	0	1	2	0	0	21.6816	0	0	0	1701.6	79.41	78.32	13388	202.79	8.925	46.73	2.5	12.02	47.5457	0.403553	3	835.466	3	337.411	3	237.914	3	164.527	3	7	1	0	1	0
209	1	2	74	0	1	1	0	0	0	2	0	1	24.5703	0	0	0	1921.73	105.83	73.08	16997.8	130.32	125	31.28	2.51	18.92	40.6175	0.406588	3	835.466	3	337.411	3	237.914	1	26.3893	3	7	3	5.25	1	0
209	0	1	62	0	2	1	0	1	0	2	0	0	23.3887	0	0	0	1216.61	28.94	87.22	3292.46	54.64	125	41.08	0.75	4.96	29.3141	0.406529	1	419.669	1	26.9267	3	237.914	1	26.3893	2	1.5	2	0.75	1	0
210	0	2	73	0	1	1	0	1	0	2	0	0	22.6843	0	0	0	1653.98	33.86	120.6	5575.37	43.37	53.575	55.3	1.28	6.84	30.9483	0.409309	1	419.669	2	169.168	1	60.432	1	26.3893	2	1.5	2	0.75	1	0
210	1	1	59	1	2	1	0	0	0	2	0	0	17.3388	0	0	1	1695.44	50.22	105.14	747.3	47.33	125	55.21	1.26	8.56	40.437	0.409013	1	419.669	1	26.9267	1	60.432	1	26.3893	2	1.5	1	0	1	0
211	0	1	67	1	2	0	0	2	0	2	1	0	23.7338	0	0	0	3350.37	129.36	179.54	11541.4	234.55	125	42.21	2.76	22.02	34.678	0.410963	2	637.314	2	169.168	2	122.727	1	26.3893	3	7	3	5.25	1	0
211	1	2	72	0	2	1	1	0	0	2	0	1	26.1341	0	0	0	1429.81	60.98	69.83	9681.65	106.78	125	32.68	1.87	9.49	46.6832	0.409909	3	835.466	2	169.168	3	237.914	3	164.527	2	1.5	2	0.75	1	0
212	0	1	64	0	1	1	0	0	0	2	0	1	26.9983	0	0	0	1540.54	106.24	82.46	5633.48	118.68	17.85	30.77	2.31	21.51	24.3877	0.411391	1	419.669	1	26.9267	2	122.727	3	164.527	1	0	1	0	1	0
212	1	2	73	0	1	0	0	0	0	1	0	1	30.3317	1	0	0	1630.65	68.93	66	3229.33	98.57	125	29.56	2.99	16.52	34.7411	0.410446	2	637.314	3	337.411	1	60.432	2	82.5194	1	0	2	0.75	2	7.9996
213	0	1	63	0	2	1	0	0	0	2	0	0	22.0051	0	0	0	1309.49	51.13	49.24	4001.82	66.24	71.425	18.55	1.7	7.93	33.6459	0.412328	2	637.314	2	169.168	1	60.432	2	82.5194	2	1.5	2	0.75	1	0
213	1	2	71	0	2	1	0	0	1	1	0	1	25.0658	0	0	0	1160.84	25.02	63.55	200.73	0	125	22.56	0.73	5.09	36.3093	0.412695	1	419.669	1	26.9267	1	60.432	1	26.3893	1	0	1	0	1	0
214	1	2	80	0	1	0	0	0	0	1	0	0	21.5675	0	0	0	3060.95	125.97	141.24	8590.52	121.75	8.925	58.36	3.19	17.76	35.6309	0.413023	2	637.314	3	337.411	1	60.432	1	26.3893	2	1.5	2	0.75	2	7.9996
214	0	1	62	1	2	1	0	3	0	2	1	1	26.8858	0	0	1	2233.6	67.9	87.36	7163.79	84.81	125	42.86	2	11.5	40.9906	0.413769	1	419.669	1	26.9267	1	60.432	1	26.3893	2	1.5	2	0.75	1	0
215	0	1	65	0	1	1	0	1	0	2	0	0	23.8304	0	0	0	1700.28	63.95	56.98	6674.83	139.57	89.275	32.14	1.99	11.26	39.6037	0.413938	3	835.466	3	337.411	2	122.727	2	82.5194	2	1.5	2	0.75	2	7.9996
215	1	2	72	0	2	1	0	0	1	2	0	0	19.6846	0	1	0	1348.57	64.85	30.28	10298.1	60.84	0	42.81	2.1	9.75	41.9088	0.413875	2	637.314	1	26.9267	2	122.727	3	164.527	2	1.5	1	0	1	0
216	1	1	65	0	1	1	0	0	0	2	0	1	25.6382	0	1	0	1684.27	48.48	63.45	4552.83	78	71.425	29.45	1.32	8.75	28.4777	0.414721	2	637.314	3	337.411	1	60.432	1	26.3893	2	1.5	3	5.25	1	0
216	0	2	76	0	2	1	0	0	0	1	0	1	25.2248	0	0	0	2175.52	84.93	74.13	7983.54	103.86	125	34.84	2.34	13.21	53.3955	0.414879	2	637.314	3	337.411	1	60.432	3	164.527	3	7	1	0	1	0
217	0	2	76	0	2	1	0	1	0	2	0	1	25.1148	0	1	0	2158.11	95.39	111.8	7712.9	104.24	107.15	40.01	2.16	16.91	40.1378	0.415731	3	835.466	3	337.411	2	122.727	2	82.5194	3	7	3	5.25	2	7.9996
217	1	2	72	0	2	1	1	0	1	2	0	1	26.3617	0	0	0	1327.97	59.88	63.58	5549.21	158.15	187.5	34.07	1.48	9.88	47.8389	0.414883	3	835.466	3	337.411	3	237.914	3	164.527	3	7	2	0.75	1	0
218	0	1	60	1	2	1	0	0	0	2	0	1	25.6747	0	1	0	1747.04	56.9	69.93	14903.5	35.88	250	28.47	1.09	9.73	28.6291	0.416844	1	419.669	3	337.411	1	60.432	1	26.3893	3	7	1	0	1	0
218	1	1	70	1	2	1	0	0	0	2	0	1	24.093	0	0	0	2730.53	110.11	69.58	16761.4	211.98	4.475	49.25	3.26	23.44	37.0158	0.415361	2	637.314	3	337.411	1	60.432	1	26.3893	1	0	3	5.25	2	7.9996
219	1	1	64	1	1	0	0	8	0	1	1	0	23.4586	0	1	0	2596.56	77.46	144.87	4522.62	72.62	17.85	32.09	2.54	13.16	34.3179	0.416743	1	419.669	1	26.9267	1	60.432	1	26.3893	2	1.5	1	0	1	0
219	0	1	66	0	1	1	0	1	0	2	0	0	23.1544	0	1	0	1841.84	59.93	57.95	7555.24	110.88	107.15	31.14	1.54	9.58	38.009	0.41738	1	419.669	1	26.9267	2	122.727	1	26.3893	2	1.5	1	0	2	7.9996
220	1	2	79	0	2	1	0	0	0	2	0	0	20.8632	0	0	0	2740.84	89.57	118.01	7800.13	109.23	125	46.53	2.69	15.98	36.1847	0.418322	2	637.314	2	169.168	2	122.727	2	82.5194	3	7	2	0.75	1	0
220	0	2	83	0	1	0	1	0.5	1	2	0	0	22.8	0	0	0	3585.3	138.87	148.35	29902.1	310.29	125	70.68	5.51	19.95	55.2034	0.41847	3	835.466	1	26.9267	3	237.914	2	82.5194	1	0	3	5.25	1	0
221	0	2	81	0	1	1	0	2	0	2	1	1	24.4114	0	0	0	3132.69	121.82	165.68	11588.8	141.1	125	62.68	3.38	17.88	37.998	0.419887	3	835.466	2	169.168	1	60.432	3	164.527	3	7	1	0	1	0
221	1	1	65	1	1	1	0	0	0	2	0	0	18.8408	0	0	0	1606.08	58.15	76.76	11750	142.16	22.325	35.76	1.86	10.29	40.5061	0.418551	3	835.466	3	337.411	3	237.914	2	82.5194	3	7	2	0.75	1	0
222	1	1	57	1	1	1	0	1	0	1	0	1	26.1225	1	0	0	1063.28	34.8	65.73	4791.06	52.68	8.925	27.35	1.54	5.83	36.334	0.419205	1	419.669	1	26.9267	1	60.432	2	82.5194	2	1.5	2	0.75	1	0
222	0	1	60	1	2	0	1	0	1	2	0	0	20.5017	0	1	0	1662.63	53.46	51.03	15385.4	105.36	35.725	23.43	1.41	8.68	37.8676	0.420985	3	835.466	3	337.411	3	237.914	1	26.3893	3	7	2	0.75	1	0
223	1	2	76	0	1	0	0	0	0	1	0	1	29.4141	0	0	0	2026.6	79.75	110.98	7974.01	155.97	125	60.6	2.38	11.96	50.2496	0.422184	1	419.669	1	26.9267	3	237.914	2	82.5194	2	1.5	1	0	1	0
223	0	1	61	1	1	1	0	3	0	2	1	0	23.0254	0	0	0	1854.1	80.59	87	8837.81	176.6	250	46.71	2.73	12.75	39.7389	0.421988	2	637.314	1	26.9267	1	60.432	3	164.527	1	0	1	0	1	0
224	1	1	70	1	2	1	1	2	1	2	1	0	20.5536	0	0	0	2572.66	88.53	121.57	6005.52	70.74	125	45.85	2.31	16.1	52.7291	0.423108	2	637.314	3	337.411	1	60.432	1	26.3893	3	7	3	5.25	1	0
224	0	2	78	0	1	1	0	0	0	1	0	0	18.066	0	0	1	2419.4	114.56	104.8	16719.5	153.78	125	57.42	4.12	17.44	42.5582	0.423706	3	835.466	3	337.411	2	122.727	3	164.527	3	7	1	0	1	0
225	0	1	70	0	2	1	0	1	1	2	0	1	26.5095	0	0	0	2523.39	97.38	101.44	6196.58	130.05	0	37.16	2.43	14.21	43.9926	0.425534	3	835.466	3	337.411	2	122.727	1	26.3893	3	7	3	5.25	1	0
225	1	1	62	1	1	0	0	8	0	1	1	0	23.7338	0	1	0	1984.31	66.2	84.18	7208.49	118.32	125	33.79	1.49	11.01	43.659	0.426008	1	419.669	1	26.9267	2	122.727	1	26.3893	2	1.5	1	0	1	0
226	0	1	61	1	2	1	0	3	0	2	1	1	24.0184	0	0	1	1730.57	53.02	85.72	33183	75.42	17.85	33.75	1.49	10.17	38.6894	0.428073	1	419.669	1	26.9267	2	122.727	1	26.3893	2	1.5	1	0	1	0
226	1	2	76	0	2	1	0	0	1	2	0	0	20.8581	0	0	0	1913.66	44.93	41.81	558.51	6.24	0	23.62	1	9.63	31.2639	0.427747	1	419.669	1	26.9267	1	60.432	1	26.3893	1	0	1	0	1	0
227	1	1	63	1	2	1	0	0	1	1	0	1	24.6445	0	0	0	2122.15	97.5	100.49	15920.6	193.76	250	52.57	2.25	15.29	43.2878	0.42966	3	835.466	3	337.411	3	237.914	2	82.5194	3	7	3	5.25	1	0
227	0	1	64	1	2	1	0	1	0	2	0	1	26.7755	0	0	0	2358.64	74.54	94.46	4915.33	89.8	125	41.85	2.46	11.4	34.1007	0.428444	1	419.669	1	26.9267	1	60.432	2	82.5194	2	1.5	2	0.75	1	0
228	1	1	60	1	2	0	0	0	0	1	0	0	23.6624	0	0	1	1477.92	44.33	55.98	3571.54	65.67	53.575	25.96	0.93	7.98	36.9679	0.430086	1	419.669	1	26.9267	1	60.432	1	26.3893	1	0	1	0	1	0
228	0	1	68	1	1	1	0	1	0	2	0	1	25.4193	0	0	0	1975.14	66.51	62.4	9492.08	229.66	89.2857	36.52	3.02	11.67	51.489	0.431681	2	637.314	2	169.168	3	237.914	2	82.5194	2	1.5	2	0.75	2	7.9996
229	0	1	61	1	2	0	0	4	1	2	1	1	25.1974	0	0	0	1613.24	57.07	58.11	2417.36	103.95	125	40.01	1.58	9.31	27.4192	0.433872	2	637.314	3	337.411	2	122.727	1	26.3893	3	7	2	0.75	1	0
229	1	1	64	1	1	0	0	1	0	1	0	1	26.9444	0	0	0	2319.33	54.3	105.43	4027.44	50.69	17.8573	52.81	1.33	9.74	35.949	0.430386	1	419.669	1	26.9267	1	60.432	1	26.3893	1	0	1	0	1	0
230	0	1	74	0	2	1	0	4	0	1	1	0	18.9619	0	0	0	3193.16	112.72	109.74	7739.22	180.68	125	54.96	3.91	16.17	41.2653	0.434313	1	419.669	1	26.9267	1	60.432	2	82.5194	2	1.5	2	0.75	1	0
230	1	1	59	1	2	1	1	0	0	2	0	1	25.1746	0	0	0	1208.29	29.35	44.27	4071.14	25.63	35.725	25.91	0.77	5.82	34.6944	0.432942	1	419.669	1	26.9267	1	60.432	1	26.3893	1	0	2	0.75	1	0
231	0	1	65	1	2	1	0	0	0	1	0	0	18.3755	0	0	1	1278.76	44.28	74.7	1927.11	42.51	125	36.42	1.32	6.96	28.8274	0.434689	1	419.669	1	26.9267	2	122.727	2	82.5194	2	1.5	1	0	1	0
231	1	1	65	0	2	1	1	0	1	2	0	0	19.7578	0	0	0	1303.53	29.98	44.21	1464.47	21.27	0	23.12	0.67	6.5	32.4905	0.433462	1	419.669	1	26.9267	1	60.432	1	26.3893	1	0	1	0	1	0
232	0	1	59	1	2	1	0	2	1	2	1	1	25.2131	0	0	0	1155.66	42.94	57.39	1395.35	25.77	125	24.5	0.86	6.29	24.7228	0.435549	3	835.466	3	337.411	1	60.432	1	26.3893	3	7	3	5.25	1	0
232	1	1	63	1	2	1	0	3	0	2	1	0	14.9184	0	0	0	1999.73	70.8	70.6	3766.77	73.85	125	30.29	2.37	13.77	48.215	0.435717	2	637.314	2	169.168	1	60.432	3	164.527	2	1.5	3	5.25	1	0
233	0	1	62	1	1	0	0	1	0	2	0	1	28.7614	0	0	0	1648.3	54.11	66.39	3978.5	56.75	35.725	39.23	1.19	9.08	35.4661	0.442646	1	419.669	1	26.9267	1	60.432	2	82.5194	2	1.5	2	0.75	1	0
233	1	1	68	1	2	0	0	5	0	2	1	1	29.0688	0	0	0	1882.9	97.84	56.28	1817.38	69.19	0	24.08	1.68	21.99	28.2892	0.436248	2	637.314	3	337.411	1	60.432	1	26.3893	1	0	3	5.25	2	7.9996
234	0	1	76	0	2	1	0	2	0	2	1	0	22.5178	0	0	0	3438.17	68.4	268.96	3225.83	82.19	125	127.41	1.68	12.28	45.5678	0.443183	1	419.669	2	169.168	1	60.432	1	26.3893	1	0	3	5.25	1	0
234	1	1	73	0	2	1	0	0	0	2	0	0	22.1488	0	1	1	2910.32	111.18	139.9	40969.1	512.33	71.425	59.62	3.1	17.58	42.8389	0.437831	3	835.466	3	337.411	3	237.914	1	26.3893	3	7	3	5.25	1	0
235	1	2	74	0	2	1	0	0	0	2	0	1	26.25	0	1	0	1278.99	52.02	52.03	3351.22	40	71.425	18.92	1.1	9.7	33.0771	0.438185	2	637.314	3	337.411	3	237.914	1	26.3893	1	0	3	5.25	1	0
235	0	1	69	1	1	1	0	2	0	2	1	0	22.9481	1	0	0	3057.3	144.29	89.74	16393	144.33	125	42.1	3.88	26.8	47.0988	0.446332	1	419.669	1	26.9267	2	122.727	2	82.5194	2	1.5	1	0	1	0
236	0	1	62	1	2	1	1	1	0	2	0	1	27.3585	0	0	0	1561.81	50.02	78.39	3244.88	55.07	103.025	36.61	1.63	9.37	34.7391	0.446951	1	419.669	1	26.9267	1	60.432	1	26.3893	2	1.5	1	0	1	0
236	1	2	76	0	2	0	0	0	0	1	0	0	18.9244	0	0	0	1701.8	64.1	65.21	7782.22	118.47	17.85	33.94	2.53	11.5	55.5372	0.43823	3	835.466	3	337.411	2	122.727	2	82.5194	3	7	3	5.25	1	0
237	1	1	73	0	2	1	0	0	0	2	0	0	21.048	1	1	0	2827.28	136.45	123.09	18772.5	143.13	89.275	70.22	4.98	18.06	40.3567	0.441955	2	637.314	1	26.9267	2	122.727	3	164.527	1	0	2	0.75	1	0
237	0	1	68	1	2	1	0	0	0	1	0	0	20.3792	0	0	1	1662.1	66.29	80.76	15863.3	144.46	125	41.83	1.91	10.69	44.1406	0.447223	3	835.466	2	169.168	3	237.914	3	164.527	2	1.5	3	5.25	1	0
238	0	1	63	1	1	1	0	4	0	2	1	0	21.1765	0	0	0	1687.5	63.76	46.73	9961.61	60.62	142.85	27.01	1.82	11.14	38.0564	0.451248	1	419.669	1	26.9267	1	60.432	3	82.5194	2	1.5	1	0	1	0
238	1	1	68	0	2	1	1	2	1	2	1	1	25.6915	0	0	0	1710.18	64.39	87.97	9962.69	89.29	125	50.05	1.8	9.73	34.1858	0.444828	2	637.314	2	169.168	2	122.727	2	82.5194	1	0	3	5.25	1	0
239	1	2	81	0	1	0	0	0	1	2	0	1	25.5859	0	0	1	2621.4	107.67	151.4	14291.4	173.27	125	88.8	3.22	17.91	46.4032	0.445176	2	637.314	2	169.168	2	122.727	2	82.5194	2	1.5	1	0	2	7.9996
239	0	1	71	0	2	1	1	0	0	2	0	0	21.9284	0	0	1	2150.55	77.33	108.35	6456.82	124.37	125	49.86	2.55	11.46	41.5177	0.454566	3	835.466	3	337.411	2	122.727	2	82.5194	3	7	1	0	1	0
240	1	1	78	1	2	0	1	0	0	1	0	1	27.4822	0	0	0	4976.9	197.37	151.37	27031.1	294.86	35.725	69.37	8.18	23.31	38.1701	0.445695	2	637.314	2	169.168	2	122.727	3	164.527	3	7	1	0	1	0
240	0	1	62	1	1	0	0	0	0	2	0	1	24.2436	0	0	0	1380.8	99.47	54.47	5747.1	85.12	125	33.96	2.63	14.64	31.6892	0.455986	1	419.669	1	26.9267	2	122.727	3	164.527	1	0	1	0	1	0
241	1	2	77	0	1	1	0	0	0	1	0	0	16.7969	0	0	0	1701.8	64.1	65.21	7782.22	118.47	17.85	33.94	2.53	11.5	55.5372	0.44877	3	835.466	3	337.411	2	122.727	2	82.5194	3	7	3	5.25	1	0
241	0	1	69	1	1	1	0	2	1	2	1	0	22.9351	0	0	0	2849.97	97.04	118.12	3640.62	129.9	125	54.98	2.57	16.47	31.2186	0.456681	3	835.466	3	337.411	1	60.432	2	82.5194	3	7	3	5.25	2	7.9996
242	1	1	69	0	2	0	0	0	0	2	0	1	24.2031	0	0	0	1838.68	61.66	114.42	14808.3	194.94	17.85	49.87	3.73	11.89	42.48	0.448982	2	637.314	1	26.9267	3	237.914	2	82.5194	1	0	1	0	1	0
242	0	1	75	0	2	1	1	2	0	2	1	1	29.1871	0	1	0	2953.53	93.74	146.45	7027.15	113.51	125	53.74	2.32	15.12	18.9357	0.45679	1	419.669	2	169.168	1	60.432	1	26.3893	3	7	2	0.75	1	0
243	1	2	76	0	2	0	0	0	0	2	0	1	26.3702	0	0	0	1479.57	52.62	67.83	27959.4	244.1	53.575	38.23	1.6	9.42	37.5757	0.449287	3	835.466	2	169.168	3	237.914	2	82.5194	3	7	1	0	1	0
243	0	1	73	0	2	1	0	2	0	2	1	0	22.4108	1	0	0	2490.31	85.49	130.87	3537.9	82.17	107.15	63.21	2.38	16.59	51.8722	0.458766	1	419.669	3	337.411	1	60.432	2	82.5194	2	1.5	2	0.75	2	7.9996
244	1	1	64	1	2	1	0	2	0	2	1	1	25.4694	1	0	0	1926.41	73.27	74.9	11289.4	194.29	89.275	40.68	2.1	11.87	36.3932	0.449899	3	835.466	2	169.168	3	237.914	2	82.5194	2	1.5	2	0.75	1	0
244	0	2	76	0	2	1	1	0	1	2	0	1	26.8327	0	0	0	1244.55	48.11	43.94	4541.17	104.02	125	25.06	1.34	9.35	34.9834	0.461034	3	835.466	3	337.411	2	122.727	3	164.527	3	7	3	5.25	1	0
245	1	2	81	0	1	1	0	2	0	2	1	1	27.0538	0	0	1	2506.79	122.96	111.69	15481.5	165.94	125	63.22	4.22	17.02	50.6833	0.450889	3	835.466	3	337.411	3	237.914	3	164.527	3	7	3	5.25	1	0
245	0	1	63	1	2	1	0	8	0	2	1	1	26.263	0	0	1	1488.02	52.57	100.34	636.1	5.76	250	27.05	0.74	6.95	25.9413	0.461223	1	419.669	3	337.411	1	60.432	1	26.3893	3	7	1	0	1	0
246	1	2	79	2	2	0	0	0	0	1	0	0	16.7406	0	0	0	2063.92	103.16	75.92	67515.3	237.26	53.575	41.18	3.5	17.95	45.9354	0.451844	2	637.314	1	26.9267	3	237.914	1	26.3893	1	0	1	0	1	0
246	0	1	74	0	1	1	0	8	1	2	1	0	23.9217	0	1	0	2636.54	98.83	54.73	15070.8	286.3	125	29.11	2.66	20.83	42.5962	0.462053	3	835.466	3	337.411	3	237.914	1	26.3893	3	7	1	0	2	7.9996
247	0	1	70	1	1	0	0	0	0	1	0	1	25.4313	0	0	0	2918.18	105.83	71.31	36134.3	515.67	125	42.62	3.3	16.45	38.1066	0.463874	2	637.314	2	169.168	3	237.914	1	26.3893	3	7	1	0	1	0
247	1	1	65	1	2	1	0	0	0	2	0	0	23.5261	0	1	1	2097.05	78.69	75.36	19793.6	213.09	0	50.57	2.59	14.93	62.2178	0.451956	3	835.466	3	337.411	3	237.914	2	82.5194	3	7	3	5.25	2	7.9996
248	1	2	76	0	1	1	0	0	0	1	0	1	24.7146	0	0	0	1421.26	39.59	61.31	14863.8	163.06	125	41.97	1.56	7.21	33.7184	0.452196	3	835.466	1	26.9267	3	237.914	1	26.3893	2	1.5	1	0	1	0
248	0	1	64	1	1	1	0	0	0	2	0	0	21.6609	0	0	0	1645.66	56.39	98.09	7705.08	149.13	0	48.39	1.72	10.52	34.6255	0.46394	3	835.466	2	169.168	2	122.727	3	164.527	3	7	1	0	1	0
249	0	1	66	0	2	1	0	0	0	1	0	0	23.6614	0	0	0	840.7	24.52	36.68	6732.74	56.41	35.725	16.52	0.75	4.6	34.6986	0.467112	1	419.669	2	169.168	3	237.914	2	82.5194	2	1.5	2	0.75	1	0
249	1	2	74	0	1	1	0	0	0	2	0	0	20.2848	0	0	0	995.44	33.5	56.99	8144.67	97.64	35.725	32.3	0.86	5.36	37.0979	0.452301	2	637.314	1	26.9267	3	237.914	2	82.5194	2	1.5	1	0	1	0
250	0	1	70	0	2	1	0	0	1	2	0	0	22.7709	0	0	0	1668.76	58.38	59.01	2879.65	39.68	125	20.53	1.41	10.98	36.4425	0.468086	1	419.669	3	337.411	1	60.432	1	26.3893	2	1.5	3	5.25	1	0
250	1	1	68	0	1	1	1	3.5	0	1	1	0	22.5827	1	0	1	1517.46	52.59	92.14	10983.5	133.89	1.425	50.65	1.62	9.18	38.0955	0.454441	1	419.669	1	26.9267	3	237.914	3	164.527	1	0	1	0	1	0
251	0	2	82	0	1	1	0	0	0	1	0	0	22.5827	0	0	1	2351.55	69.63	68.71	4304.14	49.95	125	29.48	1.38	11.5	22.9367	0.469268	1	419.669	2	169.168	1	60.432	1	26.3893	3	7	2	0.75	1	0
251	1	1	62	1	1	0	0	3	1	1	1	0	19.446	0	0	0	1400.19	37.26	65.45	2889.51	34.34	53.575	33.95	0.91	6.47	24.9564	0.455017	1	419.669	1	26.9267	1	60.432	2	82.5194	1	0	1	0	1	0
252	0	2	77	0	2	1	0	0	1	1	0	0	18.6211	0	0	0	1225.48	33.49	63.79	6226.76	103.12	0	27.64	0.76	8.12	37.5048	0.472619	1	419.669	2	169.168	3	237.914	1	26.3893	2	1.5	1	0	1	0
252	1	1	64	1	1	0	0	0	0	1	0	0	22.9312	0	0	0	1815.12	75.9	67.08	4854.5	91.63	125	30.22	2.03	13.27	28.5713	0.455457	1	419.669	1	26.9267	2	122.727	1	26.3893	1	0	1	0	1	0
253	1	2	80	0	1	0	1	0	0	2	0	0	18.0859	1	1	1	2155.93	96.59	96.39	20795.6	212.59	125	55.09	3.06	13.88	28.7828	0.457834	3	835.466	3	337.411	3	237.914	3	164.527	3	7	3	5.25	1	0
253	0	1	66	1	2	1	0	3	1	2	1	1	25.8645	0	0	1	1872.03	63.57	80.83	6872	63.78	187.5	32.58	1.38	11.07	39.7292	0.473847	2	637.314	2	169.168	2	122.727	1	26.3893	3	7	1	0	1	0
254	1	1	68	1	2	1	0	2	1	2	1	1	24.3827	0	0	0	1431.51	42.89	27.64	8356.51	165.33	0	28.16	1.71	8.15	39.5979	0.458739	1	419.669	1	26.9267	3	237.914	2	82.5194	1	0	1	0	1	0
254	0	2	77	0	1	0	0	8	0	1	1	1	25.3966	0	0	0	1150.56	57.73	41.62	11433.8	134.28	4.475	37.59	2.21	8.78	46.7932	0.476385	3	835.466	1	26.9267	3	237.914	3	164.527	1	0	1	0	1	0
255	1	1	74	0	2	1	0	0	0	1	0	0	22.7573	0	0	1	2698.54	121.09	120.39	9571.04	162.56	100	41.74	3.93	26.42	44.3318	0.458948	2	637.314	3	337.411	2	122.727	3	164.527	1	0	1	0	2	7.9996
255	0	2	80	0	1	1	1	0	0	2	0	0	16.2239	0	0	0	1713.28	61.7	89.86	6184.04	112.07	250	29.79	1.19	10.75	42.3603	0.48005	3	835.466	3	337.411	3	237.914	1	26.3893	3	7	3	5.25	1	0
256	0	2	87	0	1	1	0	0	1	1	0	0	22.5925	0	1	1	3164.06	108.74	86.53	6906.5	111.24	125	40.32	3.03	17.13	43.8277	0.481675	1	419.669	3	337.411	1	60.432	1	26.3893	3	7	3	5.25	1	0
256	1	2	78	0	2	1	0	0	0	2	0	1	31.1473	0	1	0	1621.63	66.71	71.21	10360.2	207.93	62.5	67.59	2.19	12	46.209	0.463371	3	835.466	2	169.168	3	237.914	2	82.5194	1	0	3	5.25	1	0
257	0	1	66	1	1	0	0	0	0	1	0	0	22.3214	0	0	0	1696.42	48.24	70.9	5542.82	43.74	17.85	31.02	1.62	9.16	34.1876	0.482679	1	419.669	1	26.9267	1	60.432	1	26.3893	1	0	2	0.75	2	7.9996
257	1	1	73	1	1	1	0	0	0	1	0	0	17.128	0	0	0	3556.51	167.71	191.44	17910	252.96	107.15	123.61	5.54	25.53	40.4269	0.463738	3	835.466	2	169.168	2	122.727	3	164.527	3	7	1	0	1	0
258	1	1	68	0	2	1	0	0	1	2	0	0	22.1453	0	0	1	1218.37	37.67	71.16	3062.98	45.15	62.5	25.69	0.68	6.9	37.1539	0.469423	2	637.314	3	337.411	2	122.727	2	82.5194	3	7	1	0	1	0
258	0	2	80	0	1	0	0	1	0	1	0	0	15.831	0	1	0	1642.65	62.03	89.95	5651.42	58.9	71.425	34.06	1.67	9.12	26.7324	0.483605	1	419.669	3	337.411	1	60.432	1	26.3893	3	7	3	5.25	1	0
259	0	1	66	1	1	1	0	0	0	2	0	1	25.6931	0	0	0	1637.21	61.5	88.87	5467.75	198.03	125	41.97	2.29	9.72	28.7385	0.48566	1	419.669	1	26.9267	2	122.727	2	82.5194	1	0	1	0	1	0
259	1	2	80	0	2	1	1	2	1	2	1	1	26.9989	1	0	0	1911.11	76.82	69.87	7570.13	90.86	125	35.44	1.95	11.67	43.8786	0.470107	2	637.314	3	337.411	2	122.727	2	82.5194	3	7	2	0.75	1	0
260	1	1	79	0	1	1	0	3	1	2	1	0	21.9037	0	0	0	3484.01	152.19	145.7	18735.2	178.42	125	75.69	5.51	23.62	65.4933	0.472683	2	637.314	2	169.168	2	122.727	3	164.527	3	7	3	5.25	1	0
260	0	2	80	0	1	0	1	0	0	2	0	1	28.3493	0	0	0	1593.35	73.6	54.31	10375.1	91.08	125	36.82	2.27	11.2	44.8954	0.486087	2	637.314	2	169.168	3	237.914	2	82.5194	2	1.5	2	0.75	1	0
261	1	1	65	1	1	1	0	5	0	1	1	1	26.298	0	1	0	1671.49	45.09	74.22	3431.84	38.97	17.85	42.4	1.19	7.5	29.1573	0.473278	1	419.669	1	26.9267	1	60.432	2	82.5194	2	1.5	1	0	1	0
261	0	1	83	0	1	1	0	2	0	1	1	0	23.7603	0	0	0	4050.52	237.55	162.65	27912.4	245.63	125	138.2	6.93	32.91	46.0424	0.486817	2	637.314	1	26.9267	3	237.914	2	82.5194	1	0	3	5.25	1	0
262	0	1	80	0	1	1	1	6	0	2	1	0	20.6126	0	0	0	3312.26	114.03	87.96	10142.2	151.96	125	42.19	3.27	18.42	48.249	0.491987	2	637.314	3	337.411	2	122.727	1	26.3893	3	7	3	5.25	1	0
262	1	1	76	0	1	1	1	0	1	2	0	1	24.2215	1	0	0	2831.95	93.31	129.09	16813.7	199.6	7.15	36.09	2.37	11.99	52.4965	0.47351	1	419.669	1	26.9267	2	122.727	1	26.3893	1	0	2	0.75	1	0
263	1	2	79	2	2	0	0	0	0	1	0	0	23.6394	0	0	0	1626.32	94.24	74.47	19029.9	87.71	0	36.1	1.59	17.32	25.2847	0.47377	1	419.669	2	169.168	2	122.727	1	26.3893	1	0	2	0.75	2	7.9996
263	0	1	71	1	2	1	0	2	0	2	1	1	27.0538	1	0	0	2497.62	76.8	143.18	8831.11	63.25	187.5	68.21	2.41	11.46	43.0324	0.49568	2	637.314	1	26.9267	1	60.432	2	82.5194	2	1.5	2	0.75	1	0
264	1	1	63	1	2	1	0	0	0	2	0	1	25.5363	0	0	1	1180.3	34.76	71.93	3282.22	49.93	125	28.37	1.04	6.06	25.4216	0.476668	3	835.466	3	337.411	1	60.432	3	164.527	3	7	2	0.75	1	0
264	0	1	75	0	2	1	0	0	0	2	0	0	21.4187	0	0	0	2171.8	72.73	86.69	23989.1	229.66	125	40.08	2.08	12.19	40.3194	0.496075	3	835.466	1	26.9267	3	237.914	2	82.5194	2	1.5	1	0	1	0
265	0	1	79	0	2	1	0	1	1	2	0	1	25.2082	0	0	0	3006.49	113.65	123.73	5646.52	143.18	125	44.09	3.03	21.34	43.782	0.496719	2	637.314	3	337.411	1	60.432	1	26.3893	3	7	2	0.75	2	7.9996
265	1	2	75	1	1	1	1	0	1	1	0	1	28.832	0	0	0	1768.28	81.96	78.86	4141.71	66.78	53.575	30.1	2.03	13.52	34.1879	0.482623	2	637.314	2	169.168	2	122.727	3	164.527	2	1.5	1	0	1	0
266	0	1	67	1	2	1	0	2	1	2	1	0	23.045	0	0	0	1368.82	60.51	56.81	14091.2	114.44	71.425	39.57	2.59	11.27	37.0841	0.509855	2	637.314	1	26.9267	3	237.914	3	164.527	2	1.5	2	0.75	1	0
266	1	1	68	0	1	1	0	0	0	1	0	1	29.6444	0	1	0	948.99	18.4	41.35	7513.23	48.27	0	23.77	0.55	4.86	29.7865	0.482966	1	419.669	1	26.9267	3	237.914	1	26.3893	1	0	1	0	1	0
267	1	1	82	0	2	1	0	0	0	2	0	1	25.6994	1	0	0	3840.3	178.27	191.75	14151.7	226.3	107.15	81.45	4.99	21.86	40.3813	0.486734	3	835.466	2	169.168	2	122.727	2	82.5194	3	7	3	5.25	1	0
267	0	2	84	0	1	1	1	0	0	1	0	0	21.5269	0	1	0	1879.05	50.69	67.32	3334.64	78.6	17.85	34.72	1.9	8.25	32.1512	0.514387	1	419.669	1	26.9267	2	122.727	2	82.5194	2	1.5	2	0.75	2	7.9996
268	0	1	68	1	2	1	0	0.5	0	2	0	0	21.5243	0	0	1	1398.25	42.14	55.65	1210.36	18.51	17.85	14.14	0.95	7.14	25.018	0.519041	1	419.669	1	26.9267	1	60.432	1	26.3893	2	1.5	1	0	1	0
268	1	1	69	1	2	1	1	4	1	2	1	1	26.0197	1	0	1	2165.32	85.5	102.99	8985.98	196.15	250	44.81	2.09	13.69	16.4132	0.491074	2	637.314	2	169.168	2	122.727	2	82.5194	3	7	1	0	1	0
269	1	1	69	1	2	1	0	2	1	2	1	0	21.9848	0	0	0	889.77	20.97	41.78	13072.7	74.78	0	25.21	0.62	4.24	28.2341	0.49662	2	637.314	1	26.9267	3	237.914	2	82.5194	1	0	1	0	1	0
269	0	2	83	0	1	1	1	1	0	2	0	0	19.1051	0	0	0	1487.68	54.28	59.13	5585.14	51.11	125	22.42	1.26	8.43	36.4088	0.52342	2	637.314	3	337.411	2	122.727	3	164.527	3	7	2	0.75	1	0
270	1	1	73	0	2	0	0	1	1	2	0	1	26.6749	0	0	0	1668.14	42.25	43	7287.24	92.76	0	26	0.89	8.3	24.4405	0.500102	1	419.669	1	26.9267	3	237.914	1	26.3893	1	0	1	0	1	0
270	0	2	82	0	1	1	1	2	0	1	1	0	22.0603	0	0	0	1252.31	40.9	56.87	5378.7	65.46	125	33.14	1.48	6.75	32.3199	0.524601	1	419.669	1	26.9267	2	122.727	2	82.5194	1	0	1	0	1	0
271	0	1	74	0	2	1	0	0	0	1	0	0	21.7776	0	0	0	1311.36	42.85	68.55	3030.88	36.06	125	26.87	0.97	8.22	27.6383	0.528725	1	419.669	2	169.168	1	60.432	2	82.5194	2	1.5	1	0	1	0
271	1	1	71	1	2	1	0	0	0	1	0	0	23.5078	1	1	0	2383.49	80.11	89.94	11214	176.54	44.65	41.68	2.23	10.06	52.633	0.501431	1	419.669	1	26.9267	2	122.727	1	26.3893	1	0	2	0.75	1	0
272	0	1	75	1	1	0	0	2	0	1	1	0	23.5615	0	1	0	2572.2	90.02	117.68	9736.19	92.75	125	61.41	2.8	12.45	33.871	0.534572	1	419.669	1	26.9267	2	122.727	2	82.5194	2	1.5	1	0	1	0
272	1	1	73	1	2	1	1	0	0	1	0	0	23.3844	1	0	0	1460.87	57.32	74.55	5069.38	44.82	0	28.42	1.17	5.32	41.5116	0.510545	1	419.669	1	26.9267	1	60.432	1	26.3893	1	0	1	0	1	0
273	0	1	79	1	2	1	0	0.5	0	1	0	0	18.5859	0	0	0	2227.82	92.6	87.87	22039.3	219.26	125	37.98	2.9	14.09	51.4773	0.535895	3	835.466	2	169.168	3	237.914	2	82.5194	3	7	1	0	1	0
273	1	1	76	0	2	1	1	0	1	1	0	0	22.8624	0	1	0	2083.33	96.83	69.25	11475.3	104.48	0	74.52	3.19	14.77	53.3134	0.511207	2	637.314	1	26.9267	1	60.432	3	164.527	1	0	1	0	1	0
274	1	2	80	0	2	1	0	0	0	2	0	1	24.3266	0	0	1	1005.31	13.26	81.56	2839.14	25.77	2.5	44.43	0.37	3.44	30.2733	0.51571	1	419.669	2	169.168	1	60.432	1	26.3893	2	1.5	3	5.25	1	0
274	0	1	73	1	2	1	0	2	0	2	1	0	23.5078	0	1	0	2058.12	78.99	42.65	6102.27	97.98	125	34.44	3.04	12.77	43.5838	0.5391	1	419.669	1	26.9267	1	60.432	2	82.5194	1	0	1	0	1	0
275	0	1	81	0	2	1	0	0	0	2	0	0	19.8058	0	0	1	2557.16	109	96.33	46292.6	336.92	125	52.66	3.95	18.91	41.6683	0.540624	3	835.466	2	169.168	3	237.914	3	164.527	3	7	1	0	1	0
275	1	1	74	0	1	1	0	10	1	1	1	1	24.6079	0	0	0	1496.58	40.51	56.01	11315.9	101.95	0	31.43	1.3	6.54	21.4095	0.519414	1	419.669	1	26.9267	3	237.914	1	26.3893	1	0	1	0	1	0
276	0	1	69	1	2	1	0	0	0	2	0	0	23.6324	0	0	0	1145.83	50.39	46.52	7486.36	106.49	102.675	29.38	1.64	10.79	33.177	0.542344	3	835.466	3	337.411	3	237.914	3	164.527	2	1.5	2	0.75	2	7.9996
276	1	1	70	1	2	1	0	5	0	2	1	0	19.972	0	0	0	1683.08	60.44	69.97	5295.4	100	125	43.75	2.05	9.6	39.4642	0.526026	2	637.314	3	337.411	2	122.727	2	82.5194	3	7	3	5.25	1	0
277	0	1	75	0	2	1	0	0	1	1	0	0	21.5225	0	0	0	1036.65	25.58	58.22	12535.2	140.6	53.575	27.83	1.03	5.34	28.869	0.553075	1	419.669	1	26.9267	3	237.914	1	26.3893	1	0	2	0.75	1	0
277	1	1	81	0	2	1	1	2	0	2	1	0	22.4631	0	0	0	2706.08	89.57	114.14	7800.13	109.23	125	44.41	2.69	15.92	36.1843	0.53316	2	637.314	2	169.168	2	122.727	2	82.5194	3	7	2	0.75	1	0
278	1	1	79	1	2	1	0	0	1	2	0	0	21.0772	0	0	1	2228.11	121.48	77.87	14881.7	90.91	125	76.06	3.71	17.2	46.746	0.53588	2	637.314	1	26.9267	2	122.727	3	164.527	2	1.5	2	0.75	1	0
278	0	1	75	0	2	1	1	0	0	2	0	0	23.4337	0	1	0	924.74	21.17	43.84	8355.83	87.98	10.725	25.56	0.69	4.17	33.1451	0.558644	1	419.669	1	26.9267	3	237.914	1	26.3893	2	1.5	2	0.75	1	0
279	0	1	71	1	1	1	0	0	0	2	0	0	22.7488	0	0	0	1185.95	28.33	47.32	4612.6	41.21	0	26	0.91	5.77	28.9455	0.561464	1	419.669	1	26.9267	1	60.432	3	164.527	1	0	1	0	1	0
279	1	1	73	1	2	1	0	0	0	1	0	1	26.7755	1	0	0	2049.53	132	79.34	17208.1	295.19	35.725	63.46	3.78	14.25	43.6462	0.53953	3	835.466	1	26.9267	3	237.914	3	164.527	1	0	1	0	1	0
280	0	2	85	0	1	0	0	0	0	2	0	0	15.0757	0	1	0	837.08	25.59	43.74	3461.41	44.19	35.725	14.79	0.7	6.17	35.3295	0.576957	3	835.466	3	337.411	2	122.727	1	26.3893	2	1.5	2	0.75	2	7.9996
280	1	1	75	1	2	1	0	0	0	1	0	0	21.3599	1	0	1	1141.13	65.19	67.37	9525.58	67.17	71.425	40.59	1.71	8.22	27.5542	0.547864	2	637.314	1	26.9267	2	122.727	3	164.527	1	0	1	0	1	0
281	1	1	78	1	1	1	0	1	0	1	0	0	19.4458	0	1	1	2660.1	107.89	122.79	4766.96	46.2	250	23.94	1.91	16.05	16.4999	0.561907	1	419.669	1	26.9267	1	60.432	1	26.3893	1	0	1	0	1	0
281	0	1	86	1	2	0	0	1	0	2	0	1	25.0593	0	0	0	2675.16	124.23	139.35	18399.8	234.17	125	72.76	3.81	16.63	21.4177	0.587246	3	835.466	1	26.9267	3	237.914	3	164.527	2	1.5	1	0	2	7.9996
282	0	1	84	0	2	1	0	0	1	1	0	0	15.0885	0	1	0	2212	96.16	83.75	10343.2	145.57	0	40.17	2.32	21.69	46.3646	0.589171	2	637.314	3	337.411	2	122.727	1	26.3893	1	0	1	0	2	7.9996
282	1	1	70	1	1	1	1	0	0	2	0	1	25.6055	0	0	0	937.5	26.59	52.82	4707.37	76.66	89.275	30.93	1.2	4.98	33.2968	0.563279	1	419.669	1	26.9267	2	122.727	2	82.5194	1	0	1	0	1	0
283	0	2	86	0	2	1	0	0	0	1	0	0	18.7556	0	1	0	788.78	23.77	43.86	1431.51	19.75	35.725	18	0.66	4.24	28.4692	0.589702	2	637.314	3	337.411	1	60.432	2	82.5194	1	0	3	5.25	1	0
283	1	1	77	0	1	0	1	0	0	1	0	0	23.5199	0	1	0	1230.81	24.86	70.83	2589.18	26.92	0	26.89	0.71	5.39	23.2433	0.564484	1	419.669	1	26.9267	1	60.432	1	26.3893	1	0	1	0	1	0
284	0	1	74	1	2	1	0	0	1	2	0	1	24.1308	0	1	1	1015.07	30.49	45.57	7604.38	129.32	71.4285	28.39	0.89	6.55	30.6909	0.601008	2	637.314	1	26.9267	3	237.914	1	26.3893	2	1.5	1	0	1	0
284	1	1	79	1	2	0	0	1	0	2	0	0	23.939	1	0	0	1990.88	77.65	81.51	11152.8	119.95	0	33.86	2.58	10.98	28.43	0.605038	1	419.669	1	26.9267	2	122.727	3	164.527	2	1.5	1	0	1	0

## Sheet: Variable label
Variable Name	Description	Units
Match_ID	Matched pairs
AMD_status	Presence of age-related macular degeneration	0=no; 1=yes
Gender	Biological Sex	1=male, 2=female
Age	Ages	year
Smoking	Smoking status	1=current somker, 2=never/former smoker
Education_Level	Educational attainment	1=less than college graduate;2=college or above
Physical_Activity	Self-reported regular physical activity	0=no; 1=yes
Supp_Use	Dietary supplement use	0=no; 1=yes
Sunlight_Exposure_Time	Daily sunlight exposure duration	hours/d
Sunlight_Protection	Protective gear use	0=no; 1=yes
Phonetime_cat2	hours/d	hours/d
Sunlight_Category	Categories of sunlight exposure	0=<1; 1= ≥1
BMI_Category	BMI categories	0=<24 kg/m2; 1= ≥ 24kg/m2
BMI	Body mass index	kg/m2
Family_History_AMD	Famliy history of AMD	0=no; 1=yes
CVD_History	Self-reported history of cardiovascular disease	0=no; 1=yes
Diabetes_History	Self-reported history of type 2 diabetes	0=no; 1=yes
Total_Energy	Total energy intake	kcal
Dietary_Protein	Dietary protein intake	g
Dietary_Lipid	Dietary lipid intake	g
Dietary_Lutein	Dietary lutein intake	µg
Dietary_Vit_C	Dietary vitamin C intake	mg
Dietary_Vit_D	Dietary vitamin D intake	ug
Dietary_Vit_E	Dietary vitamin E intake	mg
Dietary_Copper	Dietary Copper intake	mg
Dietary_Zinc	Dietary Zinc intake	mg
ModifiedAHEI	Modified Alternate Healthy Eating Index
Propensity_Score
Calcium_EnergyAdj_Tertile	Energy-adjusted total dietary calcium	0=<543.1 mg/2000 kcal, 1=543.1-716.4 mg/2000 kcal, 3=>716.4 mg/2000 kcal
Calcium_EnergyAdj_Linear	Energy-adjusted total dietary calcium (Continuous)
DairyCa_EnergyAd_Tertile	Energy-adjusted dairy calcium	0=<102.8 mg/2000 kcal, 1=102.8-236.6 mg/2000 kcal, 3=>236.6 mg/2000 kcal
DairyCa_EnergyAdj_linear	Energy-adjusted dairy calcium (Continuous)
VegCa_EnergyAdj_Tertile	Vegetable-based calcium (Tertiles)	0=<543 mg/2000 kcal, 1=543-716 mg/2000 kcal, 3=>716 mg/2000 kcal
VegCa_EnergyAdj_linear	Energy-adjusted vegetable calcium (Continuous)
SoyCa_EnergyAdj_Tertile	Soy-derived calcium	0=<50.0 mg/2000 kcal, 1=50.0-111.8 mg/2000 kcal, 3=>111.8 mg/2000 kcal
SoyCa_EnergyAdj_linear	Soy-derived calcium (Continuous)
Milk_cat3	Milk consumption frequency	0=Never/rarely, 1=1-3 servings/week, 2=≥4 servings/week
Milk_linear	Milk consumption (Continuous)
Yogurt_cat3	Yogurt consumption	0=Never/rarely, 1=1 serving/week, 2=≥2 servings/week
Yogurt_linear	Yogurt consumption (Continuous)
Milkpowder_cat2	Milk powder consumption	0=Never/rarely, 1=≥1 serving/week
Milkpowder_linear	Milk powder consumption (Continuous)
